# Supplementary material for: High-Speed Videography Reveals How Honeybees Can Turn a Spatial Concept Learning Task Into a Simple Discrimination Task by Stereotyped Flight Movements and Sequential Inspection of Pattern Elements
Source: Front Psychol. 2018 Aug 3;9:1347. doi: 10.3389/fpsyg.2018.01347 (PMC6086205; doi:10.3389/fpsyg.2018.01347)
Supplement: Supplementary file 1 [file Data_Sheet_1.xlsx]

## Sheet: A+
1st FIXATION SHAPE
block	exited	cs+ feeder touch	cs+ feeder	cs+ target	cs+ cross	cs- feeder touch	cs- feeder	cs- target	cs- cross
1	0	5	0	0	12	2	0	18	3
2	0	6	0	0	16	6	1	8	3
3	0	3	0	2	18	2	0	12	3
4	0	4	1	2	17	4	1	9	2
5	0	5	0	3	14	5	1	9	3
1st FIXATION SHAPE (reordered - don't edit)
block	exited	cs+ cross	cs- cross	cs+ feeder touch	cs+ feeder	cs- feeder touch	cs- feeder	cs+ target	cs- target
1	0	12	3	5	0	2	0	0	18
2	0	16	3	6	0	6	1	0	8
3	0	18	3	3	0	2	0	2	12
4	0	17	2	4	1	4	1	2	9
5	0	14	3	5	0	5	1	3	9
1st FIXATION LOCATION
block	exited	cs+ feeder touch	cs+ feeder	cs+ top	cs+ bottom	cs- feeder touch	cs- feeder	cs- bottom	cs- top
1	0	5	0	0	12	2	0	18	3
2	0	6	0	0	16	6	1	8	3
3	0	3	0	2	18	2	0	12	3
4	0	4	1	2	17	4	1	9	2
5	0	5	0	3	14	5	1	9	3
1st FIXATION LOCATION (reordered - don't edit)
block	exited	cs+ bottom	cs- bottom	cs+ feeder touch	cs+ feeder	cs- feeder touch	cs- feeder	cs+ top	cs- top
1	0	12	18	5	0	2	0	0	3
2	0	16	8	6	0	6	1	0	3
3	0	18	12	3	0	2	0	2	3
4	0	17	9	4	1	4	1	2	2
5	0	14	9	5	0	5	1	3	3
block	exited	cs+ bottom	cs- bottom	cs+ feeder touch	cs+ feeder	cs- feeder touch	cs- feeder	cs+ top	cs- top
1	0	0.3	0.45	0.125	0	0.05	0	0	0.075
2	0	0.4	0.2	0.15	0	0.15	0.025	0	0.075
3	0	0.45	0.3	0.075	0	0.05	0	0.05	0.075
4	0	0.425	0.225	0.1	0.025	0.1	0.025	0.05	0.05
5	0	0.35	0.225	0.125	0	0.125	0.025	0.075	0.075
2nd FIXATION SHAPE
block	exited	cs+ feeder touch	cs+ feeder	cs+ target	cs+ cross	cs- feeder touch	cs- feeder	cs- target	cs- cross
1	5	8	1	2	0	15	2	5	2
2	6	13	0	2	1	8	1	4	5
3	3	12	0	4	4	7	3	2	5
4	4	13	0	6	1	5	2	5	4
5	5	16	0	2	1	7	3	4	2
2nd FIXATION SHAPE (reordered - don't edit)
block	exited	cs+ cross	cs- cross	cs+ feeder touch	cs+ feeder	cs- feeder touch	cs- feeder	cs+ target	cs- target
1	5	0	2	8	1	15	2	2	5
2	6	1	5	13	0	8	1	2	4
3	3	4	5	12	0	7	3	4	2
4	4	1	4	13	0	5	2	6	5
5	5	1	2	16	0	7	3	2	4
2nd FIXATION LOCATION
block	exited	cs+ feeder touch	cs+ feeder	cs+ top	cs+ bottom	cs- feeder touch	cs- feeder	cs- bottom	cs- top
1	5	8	1	2	0	15	2	5	2
2	6	13	0	2	1	8	1	4	5
3	3	12	0	4	4	7	3	2	5
4	4	13	0	6	1	5	2	5	4
5	5	16	0	2	1	7	3	4	2
2nd FIXATION LOCATION (reordered - don't edit)
block	exited	cs+ bottom	cs- bottom	cs+ feeder touch	cs+ feeder	cs- feeder touch	cs- feeder	cs+ top	cs- top
1	5	0	5	8	1	15	2	2	2
2	6	1	4	13	0	8	1	2	5
3	3	4	2	12	0	7	3	4	5
4	4	1	5	13	0	5	2	6	4
5	5	1	4	16	0	7	3	2	2
block	exited	cs+ bottom	cs- bottom	cs+ feeder touch	cs+ feeder	cs- feeder touch	cs- feeder	cs+ top	cs- top
1	0.125	0	0.125	0.2	0.025	0.375	0.05	0.05	0.05
2	0.15	0.025	0.1	0.325	0	0.2	0.025	0.05	0.125
3	0.075	0.1	0.05	0.3	0	0.175	0.075	0.1	0.125
4	0.1	0.025	0.125	0.325	0	0.125	0.05	0.15	0.1
5	0.125	0.025	0.1	0.4	0	0.175	0.075	0.05	0.05
LAST 10 TRIALS
1st to 2nd FIXATION SHAPE
						2nd fixation
		exited	cs+ feeder touch	cs+ feeder	cs+ top	cs+ bottom	cs- feeder touch	cs- feeder	cs- bottom	cs- top
	exited	0	0	0	0	0	0	0	0	0
	cs+ feeder touch	5	0	0	0	0	0	0	0	0
	cs+ feeder	0	0	0	0	0	0	0	0	0
1st fixation	cs+ top	0	2	0	0	1	0	0	0	0
	cs+ bottom	0	12	0	2	0	0	0	0	0
	cs- feeder touch	0	2	0	0	0	0	0	3	0
	cs- feeder	0	0	0	0	0	0	0	1	0
	cs- bottom	0	0	0	0	0	5	2	0	2
	cs- top	0	0	0	0	0	2	1	0	0
LAST 10 TRIALS
1st to 2nd FIXATION LOCATION
						2nd fixation
		exited	cs+ feeder touch	cs+ feeder	cs+ target	cs+ cross	cs- feeder touch	cs- feeder	cs- target	cs- cross
	exited	0	0	0	0	0	0	0	0	0
	cs+ feeder touch	5	0	0	0	0	0	0	0	0
	cs+ feeder	0	0	0	0	0	0	0	0	0
1st fixation	cs+ target	0	2	0	0	1	0	0	0	0
	cs+ cross	0	12	0	2	0	0	0	0	0
	cs- feeder touch	0	2	0	0	0	0	0	3	0
	cs- feeder	0	0	0	0	0	0	0	1	0
	cs- target	0	0	0	0	0	5	2	0	2
	cs- cross	0	0	0	0	0	2	1	0	0

## Sheet: A-
1st FIXATION SHAPE
block	exited	cs+ feeder touch	cs+ feeder	cs+ target	cs+ cross	cs- feeder touch	cs- feeder	cs- target	cs- cross
1	0	3	0	0	21	1	1	21	3
2	0	2	0	3	18	6	1	17	3
3	0	3	0	2	17	4	0	22	2
4	0	2	0	1	14	6	0	21	6
5	0	5	1	1	9	6	2	23	3
1st FIXATION SHAPE (reordered - don't edit)
block	exited	cs+ cross	cs- cross	cs+ feeder touch	cs+ feeder	cs- feeder touch	cs- feeder	cs+ target	cs- target
1	0	21	3	3	0	1	1	0	21
2	0	18	3	2	0	6	1	3	17
3	0	17	2	3	0	4	0	2	22
4	0	14	6	2	0	6	0	1	21
5	0	9	3	5	1	6	2	1	23
1st FIXATION LOCATION
block	exited	cs+ feeder touch	cs+ feeder	cs+ top	cs+ bottom	cs- feeder touch	cs- feeder	cs- bottom	cs- top
1	0	3	0	0	21	1	1	21	3
2	0	2	0	3	18	6	1	17	3
3	0	3	0	2	17	4	0	22	2
4	0	2	0	1	14	6	0	21	6
5	0	5	1	1	9	6	2	23	3
1st FIXATION LOCATION (reordered - don't edit)
block	exited	cs+ bottom	cs- bottom	cs+ feeder touch	cs+ feeder	cs- feeder touch	cs- feeder	cs+ top	cs- top
1	0	21	21	3	0	1	1	0	3
2	0	18	17	2	0	6	1	3	3
3	0	17	22	3	0	4	0	2	2
4	0	14	21	2	0	6	0	1	6
5	0	9	23	5	1	6	2	1	3
block	exited	cs+ bottom	cs- bottom	cs+ feeder touch	cs+ feeder	cs- feeder touch	cs- feeder	cs+ top	cs- top
1	0	0.42	0.42	0.06	0	0.02	0.02	0	0.06
2	0	0.36	0.34	0.04	0	0.12	0.02	0.06	0.06
3	0	0.34	0.44	0.06	0	0.08	0	0.04	0.04
4	0	0.28	0.42	0.04	0	0.12	0	0.02	0.12
5	0	0.18	0.46	0.1	0.02	0.12	0.04	0.02	0.06
2nd FIXATION SHAPE
block	exited	cs+ feeder touch	cs+ feeder	cs+ target	cs+ cross	cs- feeder touch	cs- feeder	cs- target	cs- cross
1	3	19	0	1	0	19	1	5	2
2	2	17	0	3	0	18	1	3	6
3	3	16	0	4	0	17	2	1	7
4	2	10	0	3	2	22	1	4	6
5	5	8	1	0	2	20	2	5	7
2nd FIXATION SHAPE (reordered - don't edit)
block	exited	cs+ cross	cs- cross	cs+ feeder touch	cs+ feeder	cs- feeder touch	cs- feeder	cs+ target	cs- target
1	3	0	2	19	0	19	1	1	5
2	2	0	6	17	0	18	1	3	3
3	3	0	7	16	0	17	2	4	1
4	2	2	6	10	0	22	1	3	4
5	5	2	7	8	1	20	2	0	5
2nd FIXATION LOCATION
block	exited	cs+ feeder touch	cs+ feeder	cs+ top	cs+ bottom	cs- feeder touch	cs- feeder	cs- bottom	cs- top
1	3	19	0	1	0	19	1	5	2
2	2	17	0	3	0	18	1	3	6
3	3	16	0	4	0	17	2	1	7
4	2	10	0	3	2	22	1	4	6
5	5	8	1	0	2	20	2	5	7
2nd FIXATION LOCATION (reordered - don't edit)
block	exited	cs+ bottom	cs- bottom	cs+ feeder touch	cs+ feeder	cs- feeder touch	cs- feeder	cs+ top	cs- top
1	3	0	5	19	0	19	1	1	2
2	2	0	3	17	0	18	1	3	6
3	3	0	1	16	0	17	2	4	7
4	2	2	4	10	0	22	1	3	6
5	5	2	5	8	1	20	2	0	7
block	exited	cs+ bottom	cs- bottom	cs+ feeder touch	cs+ feeder	cs- feeder touch	cs- feeder	cs+ top	cs- top
1	0.06	0	0.1	0.38	0	0.38	0.02	0.02	0.04
2	0.04	0	0.06	0.34	0	0.36	0.02	0.06	0.12
3	0.06	0	0.02	0.32	0	0.34	0.04	0.08	0.14
4	0.04	0.04	0.08	0.2	0	0.44	0.02	0.06	0.12
5	0.1	0.04	0.1	0.16	0.02	0.4	0.04	0	0.14
LAST 10 TRIALS
1st to 2nd FIXATION SHAPE
						2nd fixation
		exited	cs+ feeder touch	cs+ feeder	cs+ top	cs+ bottom	cs- feeder touch	cs- feeder	cs- bottom	cs- top
	exited	0	0	0	0	0	0	0	0	0
	cs+ feeder touch	5	0	0	0	0	0	0	0	0
	cs+ feeder	0	1	0	0	0	0	0	0	0
1st fixation	cs+ top	0	1	0	0	0	0	0	0	0
	cs+ bottom	0	6	1	0	2	0	0	0	0
	cs- feeder touch	0	0	0	0	0	0	0	3	3
	cs- feeder	0	0	0	0	0	0	0	1	1
	cs- bottom	0	0	0	0	0	18	2	0	3
	cs- top	0	0	0	0	0	2	0	1	0
LAST 10 TRIALS
1st to 2nd FIXATION LOCATION
						2nd fixation
		exited	cs+ feeder touch	cs+ feeder	cs+ target	cs+ cross	cs- feeder touch	cs- feeder	cs- target	cs- cross
	exited	0	0	0	0	0	0	0	0	0
	cs+ feeder touch	5	0	0	0	0	0	0	0	0
	cs+ feeder	0	1	0	0	0	0	0	0	0
1st fixation	cs+ target	0	1	0	0	0	0	0	0	0
	cs+ cross	0	6	1	0	2	0	0	0	0
	cs- feeder touch	0	0	0	0	0	0	0	3	3
	cs- feeder	0	0	0	0	0	0	0	1	1
	cs- target	0	0	0	0	0	18	2	0	3
	cs- cross	0	0	0	0	0	2	0	1	0

## Sheet: B+
1st FIXATION SHAPE
block	exited	cs+ feeder touch	cs+ feeder	cs+ target	cs+ cross	cs- feeder touch	cs- feeder	cs- target	cs- cross
1	0	3	1	30	7	6	0	5	28
2	0	8	0	26	11	4	2	5	24
3	0	5	1	23	9	4	2	4	32
4	0	11	0	19	12	8	1	7	22
5	0	8	3	26	9	7	3	3	21
1st FIXATION SHAPE (reordered - don't edit)
block	exited	cs+ cross	cs- cross	cs+ feeder touch	cs+ feeder	cs- feeder touch	cs- feeder	cs+ target	cs- target
1	0	7	28	3	1	6	0	30	5
2	0	11	24	8	0	4	2	26	5
3	0	9	32	5	1	4	2	23	4
4	0	12	22	11	0	8	1	19	7
5	0	9	21	8	3	7	3	26	3
1st FIXATION LOCATION
block	exited	cs+ feeder touch	cs+ feeder	cs+ top	cs+ bottom	cs- feeder touch	cs- feeder	cs- bottom	cs- top
1	0	3	1	7	30	6	0	28	5
2	0	8	0	11	26	4	2	24	5
3	0	5	1	9	23	4	2	32	4
4	0	11	0	12	19	8	1	22	7
5	0	8	3	9	26	7	3	21	3
1st FIXATION LOCATION (reordered - don't edit)
block	exited	cs+ bottom	cs- bottom	cs+ feeder touch	cs+ feeder	cs- feeder touch	cs- feeder	cs+ top	cs- top
1	0	30	28	3	1	6	0	7	5
2	0	26	24	8	0	4	2	11	5
3	0	23	32	5	1	4	2	9	4
4	0	19	22	11	0	8	1	12	7
5	0	26	21	8	3	7	3	9	3
block	exited	cs+ bottom	cs- bottom	cs+ feeder touch	cs+ feeder	cs- feeder touch	cs- feeder	cs+ top	cs- top
1	0	0.375	0.35	0.0375	0.0125	0.075	0	0.0875	0.0625
2	0	0.325	0.3	0.1	0	0.05	0.025	0.1375	0.0625
3	0	0.2875	0.4	0.0625	0.0125	0.05	0.025	0.1125	0.05
4	0	0.2375	0.275	0.1375	0	0.1	0.0125	0.15	0.0875
5	0	0.325	0.2625	0.1	0.0375	0.0875	0.0375	0.1125	0.0375
2nd FIXATION SHAPE
block	exited	cs+ feeder touch	cs+ feeder	cs+ target	cs+ cross	cs- feeder touch	cs- feeder	cs- target	cs- cross
1	3	29	1	3	5	20	4	8	7
2	8	20	1	7	9	12	9	5	9
3	5	20	1	9	6	12	10	9	8
4	11	22	0	3	6	15	4	11	8
5	8	27	1	6	4	13	5	5	11
2nd FIXATION SHAPE (reordered - don't edit)
block	exited	cs+ cross	cs- cross	cs+ feeder touch	cs+ feeder	cs- feeder touch	cs- feeder	cs+ target	cs- target
1	3	5	7	29	1	20	4	3	8
2	8	9	9	20	1	12	9	7	5
3	5	6	8	20	1	12	10	9	9
4	11	6	8	22	0	15	4	3	11
5	8	4	11	27	1	13	5	6	5
2nd FIXATION LOCATION
block	exited	cs+ feeder touch	cs+ feeder	cs+ top	cs+ bottom	cs- feeder touch	cs- feeder	cs- bottom	cs- top
1	3	29	1	5	3	20	4	7	8
2	8	20	1	9	7	12	9	9	5
3	5	20	1	6	9	12	10	8	9
4	11	22	0	6	3	15	4	8	11
5	8	27	1	4	6	13	5	11	5
2nd FIXATION LOCATION (reordered - don't edit)
block	exited	cs+ bottom	cs- bottom	cs+ feeder touch	cs+ feeder	cs- feeder touch	cs- feeder	cs+ top	cs- top
1	3	3	7	29	1	20	4	5	8
2	8	7	9	20	1	12	9	9	5
3	5	9	8	20	1	12	10	6	9
4	11	3	8	22	0	15	4	6	11
5	8	6	11	27	1	13	5	4	5
block	exited	cs+ bottom	cs- bottom	cs+ feeder touch	cs+ feeder	cs- feeder touch	cs- feeder	cs+ top	cs- top
1	0.0375	0.0375	0.0875	0.3625	0.0125	0.25	0.05	0.0625	0.1
2	0.1	0.0875	0.1125	0.25	0.0125	0.15	0.1125	0.1125	0.0625
3	0.0625	0.1125	0.1	0.25	0.0125	0.15	0.125	0.075	0.1125
4	0.1375	0.0375	0.1	0.275	0	0.1875	0.05	0.075	0.1375
5	0.1	0.075	0.1375	0.3375	0.0125	0.1625	0.0625	0.05	0.0625
LAST 10 TRIALS
1st to 2nd FIXATION SHAPE
						2nd fixation
		exited	cs+ feeder touch	cs+ feeder	cs+ top	cs+ bottom	cs- feeder touch	cs- feeder	cs- bottom	cs- top
	exited	0	0	0	0	0	0	0	0	0
	cs+ feeder touch	8	0	0	0	0	0	0	0	0
	cs+ feeder	0	1	0	1	1	0	0	0	0
1st fixation	cs+ top	0	22	1	1	2	0	0	0	0
	cs+ bottom	0	4	0	3	1	0	0	0	1
	cs- feeder touch	0	0	0	0	0	1	1	2	3
	cs- feeder	0	0	0	0	0	1	0	0	2
	cs- bottom	0	0	0	0	0	0	0	0	3
	cs- top	0	0	0	1	0	11	4	3	2
LAST 10 TRIALS
1st to 2nd FIXATION LOCATION
						2nd fixation
		exited	cs+ feeder touch	cs+ feeder	cs+ target	cs+ cross	cs- feeder touch	cs- feeder	cs- target	cs- cross
	exited	0	0	0	0	0	0	0	0	0
	cs+ feeder touch	8	0	0	0	0	0	0	0	0
	cs+ feeder	0	1	0	1	1	0	0	0	0
1st fixation	cs+ target	0	4	0	1	3	0	0	1	0
	cs+ cross	0	22	1	2	1	0	0	0	0
	cs- feeder touch	0	0	0	0	0	1	1	3	2
	cs- feeder	0	0	0	0	0	1	0	2	0
	cs- target	0	0	0	0	1	11	4	2	3
	cs- cross	0	0	0	0	0	0	0	3	0

## Sheet: B-
1st FIXATION SHAPE
block	exited	cs+ feeder touch	cs+ feeder	cs+ target	cs+ cross	cs- feeder touch	cs- feeder	cs- target	cs- cross
1	0	5	0	4	2	4	0	4	11
2	0	4	0	5	1	4	1	2	13
3	0	3	0	7	3	5	0	0	12
4	0	4	0	7	2	6	0	0	11
5	0	2	0	9	4	5	1	2	7
1st FIXATION SHAPE (reordered - don't edit)
block	exited	cs+ cross	cs- cross	cs+ feeder touch	cs+ feeder	cs- feeder touch	cs- feeder	cs+ target	cs- target
1	0	2	11	5	0	4	0	4	4
2	0	1	13	4	0	4	1	5	2
3	0	3	12	3	0	5	0	7	0
4	0	2	11	4	0	6	0	7	0
5	0	4	7	2	0	5	1	9	2
1st FIXATION LOCATION
block	exited	cs+ feeder touch	cs+ feeder	cs+ top	cs+ bottom	cs- feeder touch	cs- feeder	cs- bottom	cs- top
1	0	5	0	2	4	4	0	11	4
2	0	4	0	1	5	4	1	13	2
3	0	3	0	3	7	5	0	12	0
4	0	4	0	2	7	6	0	11	0
5	0	2	0	4	9	5	1	7	2
1st FIXATION LOCATION (reordered - don't edit)
block	exited	cs+ bottom	cs- bottom	cs+ feeder touch	cs+ feeder	cs- feeder touch	cs- feeder	cs+ top	cs- top
1	0	4	11	5	0	4	0	2	4
2	0	5	13	4	0	4	1	1	2
3	0	7	12	3	0	5	0	3	0
4	0	7	11	4	0	6	0	2	0
5	0	9	7	2	0	5	1	4	2
block	exited	cs+ bottom	cs- bottom	cs+ feeder touch	cs+ feeder	cs- feeder touch	cs- feeder	cs+ top	cs- top
1	0	0.133333	0.366667	0.166667	0	0.133333	0	0.0666667	0.133333
2	0	0.166667	0.433333	0.133333	0	0.133333	0.0333333	0.0333333	0.0666667
3	0	0.233333	0.4	0.1	0	0.166667	0	0.1	0
4	0	0.233333	0.366667	0.133333	0	0.2	0	0.0666667	0
5	0	0.3	0.233333	0.0666667	0	0.166667	0.0333333	0.133333	0.0666667
2nd FIXATION SHAPE
block	exited	cs+ feeder touch	cs+ feeder	cs+ target	cs+ cross	cs- feeder touch	cs- feeder	cs- target	cs- cross
1	5	4	1	0	1	10	0	4	5
2	4	4	0	2	3	12	2	1	2
3	3	6	0	2	1	10	1	5	2
4	4	9	0	0	0	8	3	1	5
5	2	9	0	2	1	7	2	3	4
2nd FIXATION SHAPE (reordered - don't edit)
block	exited	cs+ cross	cs- cross	cs+ feeder touch	cs+ feeder	cs- feeder touch	cs- feeder	cs+ target	cs- target
1	5	1	5	4	1	10	0	0	4
2	4	3	2	4	0	12	2	2	1
3	3	1	2	6	0	10	1	2	5
4	4	0	5	9	0	8	3	0	1
5	2	1	4	9	0	7	2	2	3
2nd FIXATION LOCATION
block	exited	cs+ feeder touch	cs+ feeder	cs+ top	cs+ bottom	cs- feeder touch	cs- feeder	cs- bottom	cs- top
1	5	4	1	1	0	10	0	5	4
2	4	4	0	3	2	12	2	2	1
3	3	6	0	1	2	10	1	2	5
4	4	9	0	0	0	8	3	5	1
5	2	9	0	1	2	7	2	4	3
2nd FIXATION LOCATION (reordered - don't edit)
block	exited	cs+ bottom	cs- bottom	cs+ feeder touch	cs+ feeder	cs- feeder touch	cs- feeder	cs+ top	cs- top
1	5	0	5	4	1	10	0	1	4
2	4	2	2	4	0	12	2	3	1
3	3	2	2	6	0	10	1	1	5
4	4	0	5	9	0	8	3	0	1
5	2	2	4	9	0	7	2	1	3
block	exited	cs+ bottom	cs- bottom	cs+ feeder touch	cs+ feeder	cs- feeder touch	cs- feeder	cs+ top	cs- top
1	0.166667	0	0.166667	0.133333	0.0333333	0.333333	0	0.0333333	0.133333
2	0.133333	0.0666667	0.0666667	0.133333	0	0.4	0.0666667	0.1	0.0333333
3	0.1	0.0666667	0.0666667	0.2	0	0.333333	0.0333333	0.0333333	0.166667
4	0.133333	0	0.166667	0.3	0	0.266667	0.1	0	0.0333333
5	0.0666667	0.0666667	0.133333	0.3	0	0.233333	0.0666667	0.0333333	0.1
LAST 10 TRIALS
1st to 2nd FIXATION SHAPE
						2nd fixation
		exited	cs+ feeder touch	cs+ feeder	cs+ top	cs+ bottom	cs- feeder touch	cs- feeder	cs- bottom	cs- top
	exited	0	0	0	0	0	0	0	0	0
	cs+ feeder touch	2	0	0	0	0	0	0	0	0
	cs+ feeder	0	0	0	0	0	0	0	0	0
1st fixation	cs+ top	0	7	0	1	1	0	0	0	0
	cs+ bottom	0	2	0	1	0	0	0	1	0
	cs- feeder touch	0	0	0	0	0	1	0	1	3
	cs- feeder	0	0	0	0	0	0	0	1	0
	cs- bottom	0	0	0	0	0	1	0	0	1
	cs- top	0	0	0	0	0	5	2	0	0
LAST 10 TRIALS
1st to 2nd FIXATION LOCATION
						2nd fixation
		exited	cs+ feeder touch	cs+ feeder	cs+ target	cs+ cross	cs- feeder touch	cs- feeder	cs- target	cs- cross
	exited	0	0	0	0	0	0	0	0	0
	cs+ feeder touch	2	0	0	0	0	0	0	0	0
	cs+ feeder	0	0	0	0	0	0	0	0	0
1st fixation	cs+ target	0	2	0	0	1	0	0	0	1
	cs+ cross	0	7	0	1	1	0	0	0	0
	cs- feeder touch	0	0	0	0	0	1	0	3	1
	cs- feeder	0	0	0	0	0	0	0	0	1
	cs- target	0	0	0	0	0	5	2	0	0
	cs- cross	0	0	0	0	0	1	0	1	0
