# Supplementary material for: High-Speed Videography Reveals How Honeybees Can Turn a Spatial Concept Learning Task Into a Simple Discrimination Task by Stereotyped Flight Movements and Sequential Inspection of Pattern Elements
Source: Front Psychol. 2018 Aug 3;9:1347. doi: 10.3389/fpsyg.2018.01347 (PMC6086205; doi:10.3389/fpsyg.2018.01347)
Supplement: Supplementary file 2 [file Data_Sheet_2.xlsx]

## Sheet: Above1
Bee:	Clothilde			glance = just a fine movement towards it (head in direction of it)					no indications = scan (during few secs)
Date:	07-08.09.2016			touch = either with antennae or proboscis or both
	Above			walk = (scan+) walk on it
	Diamond
						N° fixations
# Trials	CS+ Side	Target	Half Turn	1st arm	2nd arm	1st Fixation point	2nd	3rd	4th	5th	6th	7th	8th	9	10	11	12	13	14	15	16	17	18	19	20
1	right	trefoil		left	right	cs- target	cs- feeder touch	cs- cross	cs+ cross glance	cs+ feeder touch
2	left	bar		left		cs+ feeder touch
3	left	disk		right	left	cs- cross	cs- target	cs- feeder touch	cs- target walk	cs- feeder touch	cs- target	cs- feeder touch	cs- target	cs- cross	cs- target	cs- feeder touch	cs- target	cs- feeder touch	cs- feeder touch	cs- target	cs- feeder touch	cs- cross glance	cs+ target glance	cs+ feeder touch
4	right	trefoil		left	right	cs- target glance	cs- feeder touch	cs- cross	cs+ cross glance	cs+ feeder touch
5	right	disk		left	right	cs- target	cs- target	cs- target	cs- cross glance	cs- cross	cs- feeder touch	cs- cross glance	cs- feeder touch	cs- cross	cs- feeder touch	cs- target	cs- cross	cs+ cross	cs+ feeder touch
6	left	bar		left		cs+ cross	cs+ target	cs+ feeder touch
7	right	disk		left	right	cs- target glance	cs- target	cs- cross glance	cs- target	cs- feeder touch	cs- cross	cs- cross glance	cs- feeder touch	cs- cross glance	cs- feeder	cs- target	cs- feeder touch	cs+ target glance	cs+ feeder touch
8	right	trefoil		left	right	cs- target	cs- cross	cs- feeder touch	cs- cross glance	cs- feeder touch	cs- cross glance	cs- target	cs- cross	cs+ target	cs+ cross	cs+ feeder touch
9	left	bar		left		cs+ cross glance	cs+ feeder
10	right	disk		left	right	cs- feeder touch	cs- target glance	cs- feeder touch	cs- target glance	cs- feeder touch	cs+ cross glance	cs+ feeder touch
11	left	trefoil		right	left	cs- cross	cs- target	cs- feeder touch	cs- target glance	cs- cross	cs- feeder touch	cs- cross	cs- feeder touch	cs- feeder touch	cs+ cross	cs+ cross	cs+ feeder touch
12	left	bar		left		cs+ cross glance	cs+ feeder touch
13	right	trefoil		left	right	cs- target	cs- feeder touch	cs- feeder touch	cs- cross	cs- target glance	cs+ feeder touch
14	right	disk		right		cs+ feeder touch
15	left	trefoil		right	left	cs- cross	cs- feeder touch	cs- cross	cs- target	cs- cross	cs- feeder touch	cs- cross	cs- target	cs- target	cs- feeder touch	cs- target	cs- feeder touch	cs- cross	cs- cross	cs- feeder touch	cs- target	cs- feeder touch	cs- cross glance	cs+ feeder touch
16	left	disk		left		cs+ feeder touch
17	right	bar		left	right	cs- target	cs- feeder touch	cs- cross glance	cs- target	cs- cross glance	cs- cross	cs- cross glance	cs- feeder touch	cs- cross	cs- feeder touch	cs- cross	cs- cross	cs- feeder touch	cs- cross	cs- target	cs+ cross	cs+ cross	cs+ cross	cs+ cross	cs+ feeder touch
18	left	disk		right	left	cs- target	cs- feeder touch	cs- target	cs- feeder touch	cs- cross	cs- target	cs- feeder touch	cs- cross	cs+ target glance	cs+ cross glance	cs+ feeder touch
19	right	trefoil		right		cs+ cross	cs+ target glance	cs+ feeder touch
20	left	bar		left		cs+ cross walk	cs+ feeder touch
21	left	trefoil		right	left	cs- target	cs- feeder touch	cs- cross	cs- feeder touch	cs- target	cs- target	cs- feeder touch	cs- cross	cs+ target	cs+ feeder touch
22	right	disk		left	right	cs- target	cs- feeder touch	cs- cross walk	cs- feeder touch	cs- cross glance	cs- target	cs- feeder touch	cs- cross	cs+ target	cs+ feeder touch
23	left	trefoil		right	left	cs- target	cs- cross	cs- feeder touch	cs- cross	cs+ cross	cs+ target glance	cs+ feeder touch
24	right	bar		left	right	cs- target	cs- feeder touch	cs- cross	cs+ target	cs+ cross glance	cs+ feeder touch
25	right	disk		right		cs+ cross glance	cs+ feeder touch
26	left	bar		left		cs+ cross glance	cs+ feeder touch
27	left	trefoil		left		cs+ cross	cs+ target glance	cs+ feeder touch
28	left	bar		left		cs+ cross	cs+ feeder touch
29	right	disk		left	right	cs- target glance	cs- feeder touch	cs- cross	cs- feeder touch	cs+ cross glance	cs+ feeder touch
30	right	trefoil		left	right	cs- feeder touch	cs- target	cs- cross	cs- cross	cs- target	cs- feeder touch	cs- target	cs- feeder touch	cs- target glance	cs+ feeder touch
31	left	bar		left		cs+ cross	cs+ feeder touch
32	right	disk		right		cs+ cross	cs+ feeder touch
33	left	trefoil		right	left	cs- target glance	cs- feeder touch	cs- target	cs- feeder touch	cs- target	cs- cross	cs- feeder touch	cs- target	cs+ feeder touch
34	left	bar		left		cs+ feeder touch
35	right	trefoil		right		cs+ cross	cs+ target glance	cs+ feeder touch
36	left	disk		left		cs+ cross	cs+ target	cs+ feeder touch
37	right	bar		right		cs+ cross glance	cs+ feeder touch
38	right	disk		left	right	cs- target glance	cs- cross glance	cs- feeder touch	cs- cross glance	cs- feeder touch	cs- cross	cs- target	cs- target	cs- cross glance	cs- feeder touch	cs- cross glance	cs+ cross	cs+ feeder touch
39	left	bar		left		cs+ cross glance	cs+ feeder touch
40	right	disk		left	right	cs- target	cs- feeder touch	cs- cross	cs- cross	cs- feeder touch	cs- target	cs+ cross	cs+ target	cs+ feeder touch
41	left	trefoil	(day2)	left		cs+ target glance	cs+ feeder touch
42	left	bar		left		cs+ cross glance	cs+ feeder touch
43	right	disk		left	right	cs- target glance	cs- feeder touch	cs- target	cs- feeder touch	cs- cross	cs- target glance	cs- feeder touch	cs- target	cs- cross	cs+ target glance	cs+ feeder touch
44	right	trefoil		right		cs+ cross glance	cs+ feeder touch
45	left	bar		left		cs+ cross	cs+ feeder touch
46	right	disk		left	right	cs- target	cs- feeder touch	cs- target walk	cs- target	cs- feeder touch	cs- target	cs- cross	cs- target	cs- feeder touch	cs- cross glance	cs- cross	cs+ cross	cs+ feeder touch
47	left	trefoil		left		cs+ cross glance	cs+ feeder touch
48	right	bar		left	right	cs- target	cs- feeder	cs- cross	cs- target	cs- feeder touch	cs- cross	cs- target	cs- feeder touch	cs- cross	cs- target	cs- cross	cs- target	cs- cross	cs+ target	cs+ cross	cs+ feeder touch
49	left	trefoil		left		cs+ target glance	cs+ cross	cs+ feeder touch
50	right	disk		left	right	cs- target	cs- feeder touch	cs- cross glance	cs- feeder touch	cs- target	cs- feeder touch	cs- target	cs+ cross glance	cs+ feeder touch
Tests	CS+ Side	Target	Half Turn	1st arm	2nd arm	1st Fixation point	2nd	3rd	4	5	6	7	8	9	10	11	12	13	14	15	16	17	18	19	20	21	22	23	24	25	26
T1	left	diamond		left	right	cs+ cross glance	cs+ feeder touch	cs+ cross	cs+ feeder	cs- target glance	cs- feeder touch	cs- target	cs- cross	cs- cross	cs- feeder touch	cs- target glance	cs- feeder	cs- feeder touch	cs- target	cs+ cross glance	cs+ feeder	cs+ cross	cs+ feeder	cs- cross	cs- target glance	cs- cross	cs- feeder touch	cs+ cross	cs+ feeder	cs- target	cs- feeder touch
T2	right	diamond		left	right	cs- target glance	cs- feeder	cs- cross glance	cs- feeder touch	cs- cross	cs+ target	cs+ feeder touch	cs+ target	cs+ feeder touch	cs+ cross glance	cs+ feeder touch	cs+ target glance	cs- target glance	cs- feeder	cs- cross	cs- target glance	cs- feeder	cs- feeder	cs- target	cs+ cross glance	cs+ feeder touch	cs+ target glance	cs- cross	cs- feeder	cs- cross glance	cs- target glance

## Sheet: Below1
Bee:	Gertrude
Date:	11-12.09.2016
	Below
	disk
						N° fixations
# Trials	CS+ Side	Target	Half Turn	1st arm	2nd arm	1st Fixation point	2nd	3rd	4th	5th	6th	7th	8th	9	10	11	12	13	14	15	16	17	18	19	20
1	right	diamond		left	right	cs- cross	cs- feeder touch	cs- cross	cs- target	cs+ target	cs- cross glance	cs+ target	cs+ cross	cs- cross glance	cs+ target	cs+ target walk	cs+ target	cs+ feeder touch
2	left	bar		left		cs+ cross glance	cs+ feeder touch
3	right	diamond		left	right	cs- cross glance	cs- feeder touch	cs- cross glance	cs- feeder touch	cs- feeder touch	cs+ target glance	cs+ cross	cs+ feeder touch
4	right	bar		left	right	cs- feeder touch	cs- cross	cs- feeder	cs- cross glance	cs- cross	cs- feeder	cs- cross	cs+ feeder touch
5	right	grating		left	right	cs- cross	cs- target	cs+ target	cs+ feeder touch
6	left	disk		left		cs+ target glance	cs+ feeder touch
7	right	diamond		left	right	cs- cross glance	cs- feeder touch	cs- feeder touch	cs- feeder touch	cs- feeder touch	cs- target glance	cs- feeder touch	cs- feeder touch	cs- cross glance	cs+ target glance	cs+ feeder touch
8	left	bar		left		cs+ feeder touch
9	left	diamond		left		cs+ feeder touch
10	right	grating		left	right	cs- feeder touch	cs- cross glance	cs- cross glance	cs- feeder touch	cs- cross glance	cs- feeder touch	cs- target glance	cs- feeder touch	cs- cross	cs- target	cs- feeder touch	cs+ feeder touch
11	left	bar		left		cs+ target walk	cs+ target	cs+ feeder touch
12	right	disk		left	right	cs- feeder touch	cs- feeder touch	cs- cross glance	cs- cross glance	cs- feeder touch	cs- target glance	cs- feeder touch	cs- target glance	cs- feeder touch	cs- cross glance	cs+ cross glance	cs+ feeder touch
13	right	bar		left	right	cs- cross	cs- target	cs- feeder touch	cs- cross	cs- feeder touch	cs- target	cs- cross	cs+ target	cs+ cross walk	cs+ feeder touch
14	left	diamond		left		cs+ target glance	cs+ feeder touch
15	right	grating		left	right	cs- feeder	cs- feeder touch	cs- target	cs- feeder	cs- feeder touch	cs+ cross glance	cs+ feeder touch
16	left	disk		left		cs+ target glance	cs+ feeder touch
17	right	bar		left	right	cs- cross	cs- cross walk	cs- cross walk	cs- feeder touch	cs- cross	cs- feeder touch	cs- cross	cs- feeder touch	cs- target glance	cs- cross glance	cs- feeder touch	cs+ target	cs+ feeder touch
18	right	disk		left	right	cs- cross glance	cs- feeder touch	cs- feeder touch	cs- cross	cs- target	cs+ feeder touch
19	left	grating		left		cs+ feeder touch
20	left	diamond		left		cs+ feeder touch
21	right	bar	(day 2)	left	right	cs- cross	cs- target walk	cs- feeder touch	cs- cross	cs- target	cs- feeder touch	cs- target	cs- feeder touch	cs- target	cs- cross	cs- target	cs+ feeder touch
22	right	disk		right		cs+ feeder touch
23	left	grating		left		cs+ cross glance	cs+ feeder touch
24	left	diamond		left		cs+ target	cs+ feeder touch
25	right	disk		left	right	cs- feeder touch	cs- feeder touch	cs- cross walk	cs- feeder touch	cs- feeder touch	cs- feeder touch	cs- cross	cs- target	cs- cross glance	cs- feeder	cs- feeder touch	cs- feeder touch	cs- cross	cs- target	cs+ feeder touch
26	left	bar		left		cs+ target walk	cs+ target	cs+ feeder touch
27	left	grating		right	left	cs- feeder touch	cs- cross	cs- target	cs- cross glance	cs- feeder touch	cs- cross walk	cs- feeder touch	cs- cross	cs- feeder touch	cs- cross	cs- feeder touch	cs- cross	cs- target	cs+ target	cs+ feeder touch
28	right	diamond		left	right	cs- cross	cs- feeder	cs- cross	cs- feeder touch	cs- target	cs+ cross glance	cs+ feeder touch
29	right	disk		right		cs+ target	cs+ feeder touch
30	left	grating	towards left before	right	left	cs- cross	cs- feeder touch	cs- cross walk	cs- cross walk	cs- feeder touch	cs- target	cs- cross	cs- target	cs+ target glance	cs+ feeder touch
31	right	bar		left	right	cs- cross glance	cs- feeder touch	cs+ feeder touch
32	left	disk		left		cs+ target glance	cs+ feeder touch
33	right	grating		left	right	cs- cross	cs- target walk	cs- cross glance	cs- target glance	cs- feeder	cs- target	cs- feeder touch	cs- target	cs- cross	cs- feeder touch	cs- target	cs- feeder touch	cs- target glance	cs- cross	cs- feeder touch	cs+ target	cs+ feeder touch
34	right	diamond		left	right	cs- feeder touch	cs- feeder touch	cs- cross	cs- feeder	cs- target	cs- cross	cs- feeder touch	cs- target	cs- feeder touch	cs- cross	cs- cross	cs- cross	cs- feeder touch	cs- feeder touch	cs- cross	cs+ target	cs+ feeder touch
35	left	disk		left		cs+ target	cs+ feeder touch
36	right	bar		left	right	cs- feeder touch	cs- cross	cs- feeder touch	cs+ feeder touch
37	left	diamond		left		cs+ cross glance	cs+ feeder touch
38	right	disk		left	right	cs- feeder touch	cs- cross	cs- target glance	cs+ cross glance	cs+ feeder touch
39	left	grating	towards left before	right	right	cs- cross glance	cs- feeder touch	cs- target	cs- cross	cs- feeder touch	cs- target	cs- feeder touch	cs+ target	cs+ feeder touch
40	left	bar		left		cs+ cross glance	cs+ feeder touch
41	right	diamond		right		cs+ cross glance	cs+ feeder touch
42	left	grating		left		cs+ cross glance	cs+ feeder touch
43	right	disk		left		cs- feeder touch	cs- cross walk	cs- target	cs- feeder touch	cs- cross	cs+ cross glance	cs+ feeder touch
44	right	bar		left	right	cs- cross glance	cs- feeder	cs- cross	cs- feeder touch	cs- feeder	cs- cross	cs- feeder touch	cs- feeder touch	cs- cross	cs- feeder touch	cs+ feeder touch
45	left	diamond		left		cs+ target glance	cs+ feeder touch
46	right	bar		left	right	cs- cross glance	cs- feeder touch	cs- feeder touch	cs- cross glance	cs- feeder touch	cs- cross	cs- feeder touch	cs+ target	cs+ feeder touch
47	left	grating		right	right	cs- feeder touch	cs- target	cs- feeder	cs- target	cs- feeder touch	cs- cross glance	cs- feeder touch	cs+ feeder touch
48	left	disk		left		cs+ target glance	cs+ feeder touch
49	right	grating		left	right	cs- cross glance	cs- feeder touch	cs- feeder	cs+ feeder touch
50	left	diamond		right		cs+ cross glance	cs- target glance	cs- feeder	cs- cross glance	cs- feeder	cs- target glance	cs+ cross glance	cs+ feeder touch
Tests	CS+ Side	Target	Half Turn	1st arm	2nd arm	1st Fixation point	2nd	3rd	4	5	6	7	8	9	10	11	12	13	14	15	16	17	18	19	20	21	22	23
T1	right	trefoil		right		cs+ feeder touch	cs+ cross glance	cs+ feeder touch	cs+ target	cs- feeder touch	cs- cross glance	cs- target glance	cs+ feeder touch	cs+ target glance	cs- feeder touch	cs- target glance	cs+ feeder	cs- feeder touch	cs- cross glance	cs- feeder touch	cs- feeder touch	cs+ feeder touch	cs+ target glance	cs+ cross	cs- feeder touch	cs- feeder touch	cs- feeder touch	cs+ feeder
T2	left	trefoil	towards left before	right	left	cs- cross glance	cs- feeder touch	cs- cross glance	cs- feeder touch	cs- cross glance	cs- target glance	cs+ feeder touch	cs+ target	cs+ cross	cs- feeder touch	cs- feeder touch	cs+ target glance	cs+ feeder touch	cs- feeder touch

## Sheet: Above2
Bee:	Jane
Date:	2016-09-13
	Above
	Circle
						N° fixations
# Trials	CS+ Side	Target	Half Turn	1st arm	2nd arm	1st Fixation point	2nd	3rd	4th	5th	6th	7th	8th	9	10	11	12	13	14	15	16	17	18	19	20	21	22	23	24	25	26	27	28
1	right	grating		left	right	cs- target	cs- feeder touch	cs- target	cs- feeder touch	cs- target	cs- feeder touch	cs- target	cs- cross	cs+ cross walk	cs+ cross walk	cs+ feeder touch
2	left	diamond		left		cs+ cross	cs+ feeder touch
3	right	trefoil		left	right	cs- target glance	cs- feeder touch	cs- cross glance	cs- feeder touch	cs- cross	cs- feeder touch	cs- cross glance	cs- feeder touch	cs- cross	cs- cross glance	cs- feeder touch	cs- target	cs+ cross glance	cs+ feeder touch
4	right	bar		left	right	cs- target walk	cs- feeder touch	cs- cross	cs+ cross glance	cs+ feeder touch
5	left	trefoil		left		cs+ cross glance	cs+ feeder touch
6	right	grating		left	right	cs- target glance	cs- feeder touch	cs- cross glance	cs- feeder touch	cs- cross	cs- target	cs- target	cs- feeder touch	cs+ cross	cs+ feeder touch
7	left	diamond		left		cs+ cross walk	cs+ feeder touch
8	left	bar		left		cs+ cross walk	cs+ feeder touch
9	right	trefoil		left	right	cs- cross	cs- feeder touch	cs- cross walk	cs- cross	cs- feeder touch	cs+ cross glance	cs+ feeder touch
10	right	diamond		left	right	cs- cross glance	cs- feeder	cs- cross	cs+ cross glance	cs+ feeder touch
11	left	bar		left		cs+ cross	cs+ feeder touch
12	right	trefoil		left	right	cs- target glance	cs- feeder touch	cs- target walk	cs- cross	cs- target	cs- feeder touch	cs- cross glance	cs- feeder	cs- target walk	cs- feeder touch	cs- cross glance	cs- target	cs- target	cs- cross	cs+ target	cs+ cross	cs+ target	cs+ cross	cs+ target	cs+ cross	cs+ cross	cs+ target	cs+ cross	cs+ feeder touch
13	right	grating		left	right	cs- feeder	cs- target glance	cs- feeder touch	cs- cross	cs+ target	cs+ feeder touch
14	right	diamond		left	right	cs- feeder touch	cs- cross glance	cs+ cross	cs+ feeder touch
15	left	bar		left		cs+ cross walk	cs+ feeder touch
16	left	grating		left		cs+ cross glance	cs+ feeder touch
17	right	trefoil		left	right	cs- target	cs- feeder touch	cs- target	cs- feeder touch	cs- cross glance	cs- target glance	cs- feeder touch	cs- feeder touch	cs- feeder touch	cs- feeder touch	cs- cross	cs+ cross walk	cs+ feeder
18	left	diamond		left		cs+ cross walk	cs+ feeder touch
19	left	bar		left		cs+ cross	cs+ feeder touch
20	right	grating		left	right	cs- feeder touch	cs- cross walk	cs- target	cs- feeder touch	cs- cross glance	cs- target	cs- feeder touch	cs- target glance	cs- feeder touch	cs- feeder touch	cs- cross	cs- target	cs- cross walk	cs- feeder touch	cs- cross glance	cs- feeder touch	cs- target walk	cs- cross	cs- feeder touch	cs+ cross glance	cs+ cross glance	cs+ feeder touch
21	left	trefoil		left		cs+ cross walk	cs+ feeder touch
22	right	grating		left	right	cs- target glance	cs- feeder touch	cs- target	cs- feeder	cs- cross	cs- target	cs- feeder touch	cs- cross	cs+ target	cs+ cross glance	cs+ feeder touch
23	left	diamond		left		cs+ cross	cs+ target	cs+ cross	cs+ feeder touch
24	right	bar		left	left	cs- cross	cs- feeder	cs- cross	cs- target walk	cs- cross walk	cs- target	cs- cross glance	cs- target walk	cs- target	cs- cross walk	cs- feeder touch	cs- cross	cs- target	cs- target walk	cs- cross walk	cs- feeder touch	cs- cross	cs- target	cs- cross	cs- feeder touch	cs+ cross walk	cs+ feeder touch
25	left	diamond		left		cs+ target glance	cs+ cross	cs+ feeder touch
26	right	trefoil		left	right	cs- target glance	cs- feeder	cs- cross	cs- target	cs- cross	cs- target	cs- feeder	cs- target	cs+ cross	cs+ feeder touch
27	right	grating		left	right	cs- target glance	cs- feeder touch	cs- target walk	cs- feeder touch	cs- target walk	cs- target walk	cs- feeder touch	cs- target walk	cs- feeder touch	cs- target walk	cs- feeder touch	cs+ cross	cs+ feeder touch
28	left	bar		left		cs+ cross walk	cs+ feeder touch
29	left	trefoil		left		cs+ cross glance	cs+ feeder touch
30	right	diamond		left	right	cs- cross glance	cs- feeder touch	cs- cross walk	cs- feeder touch	cs- cross walk	cs- feeder touch	cs- cross walk	cs- target	cs- cross	cs- target glance	cs- cross	cs- feeder	cs- cross glance	cs+ cross	cs+ target	cs+ feeder touch
31	right	bar		left	right	cs- feeder touch	cs- target glance	cs- feeder touch	cs- feeder touch	cs- feeder touch	cs+ feeder touch
32	left	grating		left		cs+ cross walk	cs+ feeder touch
33	right	diamond		left	right	cs- target glance	cs- cross walk	cs- feeder touch	cs- cross glance	cs- feeder touch	cs+ cross	cs+ target	cs+ cross	cs+ feeder touch
34	left	trefoil		left		cs+ cross glance	cs+ feeder touch
35	right	diamond		left	right	cs- target	cs- feeder	cs- cross glance	cs- feeder	cs- cross glance	cs+ target	cs+ feeder	cs+ target	cs+ feeder touch
36	left	grating		left		cs+ cross	cs+ target	cs+ cross	cs+ target	cs+ cross	cs+ target	cs- target	cs- cross	cs- target	cs- cross	cs+ target	cs+ cross	cs+ target walk	cs+ cross	cs+ target walk	cs+ feeder touch
37	left	bar		left		cs+ feeder touch
38	right	trefoil		left	right	cs- feeder touch	cs- target glance	cs- cross	cs- target	cs- feeder touch	cs- feeder	cs- target glance	cs+ feeder touch
39	left	bar		left		cs+ cross glance	cs+ feeder touch
40	right	grating		left	right	cs- feeder touch	cs- target	cs- feeder touch	cs- target	cs- feeder touch	cs- target	cs- cross	cs- target	cs- feeder touch	cs- feeder touch	cs- target	cs- cross	cs- target glance	cs- feeder touch	cs- target	cs- cross glance	cs- target	cs- target	cs- cross	cs- target	cs- feeder touch	cs- target glance	cs- target glance	cs- target glance	cs- feeder	cs- target	cs- cross glance	cs+ feeder touch
41	left	diamond		left		cs+ cross glance	cs+ feeder touch
42	right	trefoil		right		cs+ cross glance	cs+ feeder touch
43	right	grating		left	right	cs- target glance	cs- feeder	cs- target	cs- feeder	cs- target	cs- cross	cs+ cross	cs+ feeder touch
44	left	bar		left		cs+ cross glance	cs+ feeder touch
45	right	grating		left	right	cs- target	cs- cross	cs+ target glance	cs+ feeder touch
46	left	bar		right	left	cs- feeder touch	cs- target glance	cs- feeder	cs- target walk	cs- target	cs- cross	cs- feeder touch	cs- feeder touch	cs- cross	cs- target glance	cs- feeder	cs- feeder touch	cs- target	cs- feeder touch	cs- cross	cs- feeder touch	cs- target	cs- feeder touch	cs- cross	cs- target	cs- cross walk	cs- feeder touch	cs- target	cs- feeder	cs- feeder touch	cs+ target glance	cs+ cross	cs+ feeder touch
47	right	trefoil		left	right	cs- feeder	cs- target glance	cs- cross	cs- feeder	cs+ cross glance	cs+ feeder touch
48	right	diamond		right		cs+ cross	cs+ feeder touch
49	left	grating		left		cs+ cross glance	cs+ feeder touch
50	right	bar		left	right	cs- target glance	cs- feeder touch	cs- target	cs- cross	cs+ cross	cs+ feeder touch
Tests	CS+ Side	Target	Half Turn	1st arm	2nd arm	1st Fixation point	2nd	3rd	4	5	6	7	8	9	10	11	12	13	14	15	16	17
T1	left	disk		left		cs+ feeder touch	cs+ cross	cs+ target	cs- feeder touch	cs+ feeder touch	cs+ cross walk	cs+ target glance	cs+ cross	cs+ feeder touch	cs+ cross	cs+ target	cs- cross glance	cs- target	cs- feeder touch	cs- cross	cs- feeder touch
T2	right	disk		left	right	cs- target	cs- feeder touch	cs- cross walk	cs+ cross	cs+ target	cs+ feeder touch	cs+ target glance	cs+ cross glance	cs+ target glance	cs+ feeder touch	cs+ target glance	cs- cross	cs- target glance	cs- feeder touch	cs- cross glance	cs- target walk	cs- feeder touch

## Sheet: Below2
Bee:	Henriette
Date:	14.09.2016
	Below
	trefoil
						N° fixations
# Trials	CS+ Side	Target	Half Turn	1st arm	2nd arm	1st Fixation point	2nd	3rd	4th	5th	6th	7th	8th	9	10	11	12	13	14	15	16	17	18	19	20	21	22	23	24	25	26	27	28	29	30	31	32	33	34	35	36	37	38	39	40	41	42	43	44
1	right	disk		left	right	cs- cross glance	cs- feeder touch	cs- target glance	cs+ target glance	cs+ feeder touch
2	left	grating		left		cs+ target glance	cs+ feeder touch
3	right	bar		left	right	cs- cross	cs- feeder	cs- target	cs- cross glance	cs- feeder	cs- target glance	cs+ cross	cs- cross glance	cs- feeder	cs+ target glance	cs+ feeder touch
4	right	diamond		left	right	cs- cross glance	cs- feeder	cs- cross glance	cs- feeder	cs- target glance	cs- target glance	cs- cross glance	cs- feeder touch	cs- target	cs+ target glance	cs+ feeder touch
5	left	grating		left		cs+ target glance	cs+ feeder touch
6	right	bar		left	right	cs- cross glance	cs- feeder touch	cs- cross glance	cs- feeder touch	cs- target glance	cs+ feeder touch
7	left	disk		left		cs+ target glance	cs+ feeder touch
8	left	diamond		left		cs+ target	cs+ feeder touch
9	right	grating		left	right	cs- cross walk	cs- feeder touch	cs+ target glance	cs+ feeder touch
10	left	diamond		right	right	cs+ target glance	cs+ cross	cs- cross glance	cs- feeder touch	cs- cross glance	cs- feeder touch	cs- target glance	cs- cross glance	cs- feeder touch	cs- feeder touch	cs- cross	cs- feeder	cs- cross	cs- target glance	cs- cross	cs- feeder touch	cs- target glance	cs- cross glance	cs- cross glance	cs- feeder	cs- cross	cs- cross	cs- cross glance	cs- feeder	cs- target glance	cs- target glance	cs- cross glance	cs- feeder	cs- cross	cs- target	cs- feeder touch	cs- cross glance	cs- feeder	cs- cross glance	cs- cross glance	cs- feeder touch	cs- cross glance	cs- feeder touch	cs- cross glance	cs- feeder	cs- cross glance	cs- target	cs- cross glance	cs- feeder touch
11	right	bar		left	right	cs- cross	cs- cross	cs- feeder	cs- target	cs+ cross	cs+ feeder touch
12	left	disk		left	right	cs+ cross glance	cs+ feeder	cs+ target glance	cs+ feeder	cs+ target glance	cs+ cross glance	cs+ feeder	cs- cross glance	cs- feeder touch	cs- cross	cs- feeder	cs- cross	cs- target glance	cs+ cross	cs+ feeder touch
13	left	grating		left		cs+ target glance	cs+ feeder touch
14	right	bar		left	right	cs- feeder	cs- cross glance	cs- target glance	cs+ feeder	cs+ cross glance	cs+ target glance	cs+ feeder touch
15	right	disk		left	right	cs- cross glance	cs- feeder	cs- cross glance	cs- feeder	cs- cross glance	cs+ target glance	cs+ feeder touch
16	left	diamond		left		cs+ target glance	cs+ feeder touch
17	right	grating		left	right	cs- cross	cs- feeder	cs- cross glance	cs- feeder	cs- target	cs- cross	cs- feeder	cs- target	cs+ target	cs+ feeder touch
18	left	bar		left		cs+ feeder touch
19	right	disk		left	right	cs- cross glance	cs- feeder	cs- feeder	cs- target	cs+ target glance	cs+ feeder touch
20	left	diamond		left		cs+ feeder touch
21	right	bar		left	right	cs- cross glance	cs- feeder	cs- cross	cs- feeder	cs- cross	cs- feeder	cs- cross	cs+ target	cs+ feeder touch
22	right	diamond		left	right	cs- cross	cs- feeder touch	cs- cross	cs- target	cs+ target	cs+ target	cs+ target	cs+ cross	cs+ target	cs+ cross	cs+ target	cs+ feeder touch
23	left	disk		left		cs+ target	cs+ feeder touch
24	right	grating		left	right	cs- cross	cs- target	cs- cross	cs- target	cs+ target	cs+ feeder touch
25	left	disk		left		cs+ target	cs+ feeder touch
26	left	grating		left		cs+ cross	cs+ target	cs+ feeder touch
27	right	diamond		left	right	cs- cross glance	cs- feeder touch	cs- target	cs- feeder touch	cs- cross glance	cs- feeder	cs- target	cs+ target	cs+ feeder touch
28	left	bar		left		cs+ cross glance	cs+ target	cs+ feeder touch
29	right	disk		left	right	cs- cross glance	cs- feeder	cs- cross	cs- feeder	cs- cross	cs- target glance	cs- cross	cs- target	cs+ target	cs+ feeder touch
30	left	grating		left		cs+ cross	cs+ feeder touch
31	right	bar		left	right	cs- cross	cs- target	cs- target	cs+ cross	cs+ cross	cs+ feeder touch
32	right	diamond		left	right	cs- cross	cs- target	cs- feeder	cs- target	cs- target	cs- target	cs+ target	cs+ cross walk	cs+ feeder touch
33	left	disk		left		cs+ feeder touch
34	right	bar		left	right	cs- cross glance	cs- feeder touch	cs- cross glance	cs+ feeder touch
35	left	grating		left		cs+ cross glance	cs+ feeder touch
36	right	diamond		left	right	cs- cross glance	cs- feeder	cs- feeder	cs- cross	cs- cross	cs- feeder	cs- target glance	cs+ target	cs+ cross	cs+ feeder	cs+ cross glance	cs+ target glance	cs+ feeder touch
37	left	bar		left		cs+ cross glance	cs+ feeder touch
38	right	diamond	towards left before	right		cs+ target glance	cs+ feeder touch
39	left	grating		left		cs+ feeder touch
40	left	disk		left		cs+ target glance	cs+ feeder touch
41	right	bar		left		cs- cross glance	cs- feeder touch	cs- target walk	cs- feeder touch	cs- feeder touch	cs- target glance	cs+ target	cs+ cross	cs+ feeder touch
42	right	diamond		left	right	cs- cross glance	cs- feeder touch	cs- target glance	cs+ target glance	cs+ feeder touch
43	left	disk		left		cs+ target glance	cs+ feeder touch
44	right	bar		left		cs- cross glance	cs- feeder touch	cs- target glance	cs- cross	cs- feeder	cs- target	cs+ cross	cs+ feeder touch
45	right	grating		left	right	cs- feeder touch	cs- cross glance	cs+ target glance	cs+ feeder touch
46	left	bar		left		cs+ target glance	cs+ feeder touch
47	right	disk	towards right then	left	left	cs- feeder touch	cs- target glance	cs- feeder	cs+ feeder touch
48	left	diamond		left		cs+ feeder touch
49	left	grating		left		cs+ target glance	cs+ feeder touch
50	left	disk		left		cs+ target	cs+ feeder touch
Tests	CS+ Side	Target	Half Turn	1st arm	2nd arm	1st Fixation point	2nd	3rd	4	5	6	7	8	9	10	11	12	13	14	15	16	17	18	19	20
T1	right	trefoil		right		cs+ target	cs+ feeder touch	cs+ cross	cs- cross walk	cs- feeder touch	cs- feeder touch	cs- cross	cs- cross	cs- feeder touch	cs- cross	cs- feeder touch	cs- cross glance	cs- feeder touch	cs- cross walk
T2	left	trefoil		left	right	cs+ target glance	cs+ feeder touch	cs+ feeder touch	cs- cross	cs- feeder touch	cs-target	cs- feeder touch	cs- cross glance	cs- feeder touch	cs- feeder touch	cs- cross walk	cs- feeder touch	cs- target	cs- feeder touch	cs- target	cs+ target	cs+ feeder	cs+ cross	cs+ feeder touch
[truncated: 5 more columns]

## Sheet: Below3
Bee:	Josette
Date:	15.09.2016
	Below
	grating
						N° fixations
# Trials	CS+ Side	Target	Half Turn	1st arm	2nd arm	1st Fixation point	2nd	3rd	4th	5th	6th	7th	8th	9	10	11	12	13	14	15	16	17	18	19	20	21	22	23	24	25
1	left	disk		left		cs+ target	cs+ feeder touch
2	right	diamond		left	right	cs- cross glance	cs- feeder touch	cs- cross	cs- feeder touch	cs- cross	cs- feeder	cs- feeder touch	cs- cross	cs- feeder	cs- cross	cs- feeder	cs- target glance	cs- cross	cs- feeder touch	cs+ target glance	cs+ feeder touch
3	right	bar		left	right	cs- target	cs- feeder touch	cs- feeder touch	cs- cross walk	cs- feeder touch	cs- target	cs- cross walk	cs- feeder touch	cs- target	cs+ target	cs+ cross walk	cs+ feeder touch
4	left	trefoil		left		cs+ feeder touch
5	right	bar		left	right	cs- target	cs- cross	cs- cross	cs- target glance	cs- cross walk	cs- feeder touch	cs- cross walk	cs- cross walk	cs- feeder touch	cs- cross	cs- feeder touch	cs+ target walk	cs+ feeder touch
6	right	disk		left	right	cs- cross glance	cs- feeder touch	cs- feeder touch	cs- cross	cs- feeder touch	cs- cross	cs- feeder touch	cs- cross	cs- feeder touch	cs- target	cs+ target	cs+ feeder touch
7	right	trefoil		left	right	cs- cross glance	cs- feeder touch	cs- target walk	cs- feeder touch	cs- cross walk	cs- cross glance	cs- feeder touch	cs- target glance	cs- feeder touch	cs- cross	cs- feeder touch	cs- cross glance	cs- feeder touch	cs- target glance	cs- cross	cs- feeder	cs+ cross glance	cs+ feeder touch
8	left	diamond		left		cs+ feeder touch
9	right	bar		left	left	cs- feeder touch	cs- cross walk	cs- feeder touch	cs- feeder touch	cs- feeder	cs- feeder touch	cs- cross walk	cs- feeder touch	cs- cross glance	cs+ feeder touch
10	left	diamond		left		cs+ target glance	cs+ feeder touch
11	right	disk		left	left	cs- cross glance	cs- feeder touch	cs- cross walk	cs- cross	cs+ target	cs+ feeder touch
12	left	bar		left		cs+ feeder touch
13	right	trefoil		left	right	cs- cross glance	cs- feeder touch	cs- target	cs- cross	cs- feeder touch	cs- feeder touch	cs- target	cs- cross	cs- feeder	cs- target glance	cs- cross	cs- feeder touch	cs- target walk	cs- feeder touch	cs- feeder touch	cs+ cross glance	cs+ feeder touch
14	right	disk		left	left	cs- cross glance	cs- feeder	cs- cross glance	cs- feeder glance	cs- cross glance	cs- feeder	cs- feeder	cs- cross	cs- feeder touch	cs- cross glance	cs+ target glance	s+ feeder touch
15	left	bar	towards left before	right	left	cs- feeder touch	cs- feeder touch	cs- cross	cs- feeder touch	cs+ feeder touch
16	left	trefoil		left		cs+ target	cs+ feeder touch
17	right	bar		left	right	cs- cross	cs- feeder touch	cs- target glance	cs- cross	cs- feeder	cs- target	cs- cross	cs- feeder touch	cs- target glance	cs- cross glance	cs- target glance	cs- feeder touch	cs- cross	cs- target glance	cs- feeder touch	cs- target glance	cs- cross glance	cs- target	cs+ target glance	cs+ cross	cs+ feeder touch
18	right	disk		left	left	cs- cross glance	cs- feeder touch	cs- cross	cs- feeder touch	cs+ target glance	cs+ feeder touch
19	left	trefoil		left		cs+ feeder touch
20	right	diamond		left	right	cs- cross glance	cs- feeder	cs- target glance	cs- cross glance	cs- target glance	cs- target	cs- feeder touch	cs- target glance	cs- cross glance	cs- cross glance	cs- feeder touch	cs- target glance	cs- cross	cs- feeder touch	cs+ target	cs+ feeder touch
21	right	bar		left	right	cs- cross glance	cs- feeder touch	cs- cross	cs- feeder touch	cs- cross	cs- feeder	cs+ target	cs+ cross walk	cs+ cross glance	cs+ feeder touch
22	left	diamond		left		cs+ target walk	cs+ feeder touch
23	right	trefoil		left	right	cs- cross glance	cs- feeder touch	cs- cross	cs- cross	cs- target glance	cs- cross glance	cs+ target	cs+ feeder touch
24	left	disk		left		cs+ target	cs+ feeder touch
25	right	bar		left	right	cs- cross walk	cs- feeder touch	cs- cross walk	cs- cross	cs- feeder touch	cs- target glance	cs- cross	cs- feeder touch	cs+ feeder touch
26	right	diamond		left	right	cs- cross	cs- feeder touch	cs- cross walk	cs- cross walk	cs- feeder touch	cs- target walk	cs- cross walk	cs- feeder touch	cs+ target	cs+ feeder touch
27	left	bar		left		cs+ feeder touch
28	left	trefoil		left		cs+ feeder touch
29	right	disk		left	right	cs- cross glance	cs- feeder touch	cs- target	cs- feeder touch	cs- target	cs- feeder touch	cs- target	cs+ target glance	cs+ feeder touch
30	left	diamond		right	left	cs- cross glance	cs- feeder touch	cs- cross glance	cs- target	cs- feeder touch	cs- target glance	cs- cross	cs- feeder touch	cs- target glance	cs- target	cs- cross glance	cs- feeder touch	cs- target walk	cs+ target	cs+ cross glance	cs- cross	cs- feeder touch	cs+ target	cs+ cross	cs+ target	cs- feeder touch	cs- target	cs+ target	cs+ feeder touch
31	right	bar		left	right	cs- cross	cs- feeder	cs- cross	cs- feeder	cs- target	cs- cross walk	cs- feeder touch	cs- cross walk	cs- target	cs- cross	cs- cross	cs- target	cs- cross	cs- cross	cs+ cross	cs+ feeder touch
32	left	trefoil		left		cs+ target	cs+ feeder touch
33	left	disk		left		cs+ target	cs+ feeder touch
34	right	bar		left	right	cs- cross walk	cs- feeder	cs- cross walk	cs- cross walk	cs- feeder	cs+ feeder touch
35	left	diamond		left		cs+ feeder touch
36	right	bar		left	left	cs- feeder touch	cs- cross walk	cs- target glance	cs- cross	cs- feeder	cs- cross glance	cs- feeder touch	cs- cross glance	cs- target glance	cs- cross glance	cs- feeder touch	cs- cross walk	cs- target walk	cs- cross glance	cs- cross walk	cs- target walk	cs+ target glance	cs+ feeder touch
37	right	disk		left	right	cs- cross glance	cs- feeder touch	cs- cross	cs- feeder touch	cs- cross glance	cs- feeder touch	cs- cross walk	cs- target glance	cs- cross	cs- cross glance	cs- feeder touch	cs+ target	cs+ feeder touch
38	left	diamond		left		cs+ target glance	cs+ feeder touch
39	right	trefoil		left	left	cs- cross glance	cs- feeder touch	cs- feeder	cs- target glance	cs- cross	cs- target glance	cs+ target walk	cs+ feeder touch
40	left	diamond		left		cs+ target glance	cs+ feeder touch
41	left	disk		left		cs+ target glance	cs+ feeder touch
42	right	trefoil		left	right	cs- cross	cs- feeder touch	cs- target glance	cs- cross	cs- feeder	cs- target glance	cs- cross	cs- feeder	cs- target	cs- target	cs- feeder touch	cs- target walk	cs- feeder	cs- cross	cs- feeder touch	cs- target	cs+ target walk	cs+ feeder touch
43	right	bar		left	right	cs- feeder touch	cs- feeder touch	cs- target walk	cs- feeder touch	cs- feeder touch	cs- feeder touch	cs- target glance	cs- cross glance	cs- target glance	cs+ cross glance	cs+ feeder touch
44	left	diamond		left		cs+ target glance	cs+ feeder touch
45	right	disk		left	right	cs- cross	cs- feeder	cs- target	cs- target	cs- feeder	cs+ target	cs+ feeder touch
46	left	trefoil		left		cs+ feeder touch
47	left	bar		left		cs+ target glance	cs+ feeder touch
48	right	trefoil		left	right	cs- feeder touch	cs- cross	cs- feeder	cs- feeder touch	cs+ target glance	cs+ feeder touch
49	left	disk		left		cs+ target	cs+ target	cs+ feeder touch
50	right	diamond		left	right	cs- cross	cs- feeder touch	cs- cross glance	cs+ target	cs+ feeder touch
Tests	CS+ Side	Target	Half Turn	1st arm	2nd arm	1st Fixation point	2nd	3rd	4	5	6	7	8	9	10	11	12	13	14	15	16	17	18	19	20	21	22	23	24	25	26	27	28	29	30	31	32	33	34
T1	right	grating		left	right	cs- feeder touch	cs- cross glance	cs- target glance	cs- feeder touch	cs- cross glance	cs- feeder touch	cs- target glance	cs- cross glance	cs- feeder touch	cs+ target glance	cs+ feeder touch	cs+ cross	cs+ feeder touch	cs+ cross	cs+ cross glance	cs+ feeder touch	cs+ cross	cs- cross glance	cs- feeder touch	cs- cross	cs- feeder touch	cs- target glance	cs+ target glance	cs+ feeder touch	cs+ cross	cs+ target glance	cs+ feeder touch	cs- cross glance	cs- feeder touch	cs- cross	cs- feeder touch	cs+ cross	cs+ feeder touch	cs+ target
T2	left	grating		left		cs+ target	cs+ feeder touch	cs+ target	cs+ feeder	cs+ target glance	cs+ feeder touch	cs- feeder touch	cs- cross glance	cs- feeder touch	cs- target glance	cs- target	cs- cross glance	cs- feeder	cs- cross glance	cs- feeder touch	cs+ target glance	cs+ feeder touch	cs+ feeder touch	cs+ feeder touch	cs+ target	cs- cross glance	cs- feeder touch	cs- cross	cs- cross glance	cs- feeder	cs- target

## Sheet: Above3
Bee:	Marie-Lou
Date:	18.09.2016
	Above
	bar
						N° fixations
# Trials	CS+ Side	Target	Half Turn	1st arm	2nd arm	1st Fixation point	2nd	3rd	4th	5th	6th	7th	8th	9	10	11	12	13	14	15	16	17	18	19	20	21	22	23	24	25	26	27	28	29	30
1	right	trefoil		right		cs+ cross walk	cs+ feeder touch
2	left	diamond		left		cs+ cross	cs+ feeder touch
3	right	grating		left	right	cs- target	cs- feeder touch	cs+ feeder touch
4	right	disk		right		cs+ cross walk	cs+ feeder touch
5	left	diamond		right	left	cs- target	cs- feeder touch	cs- cross walk	cs- cross	cs- cross	cs- feeder touch	cs- target glance	cs- cross	cs- feeder touch	cs- cross	cs+ cross	cs+ feeder touch
6	left	disk		right	right	cs- target	cs- feeder touch	cs- feeder touch	cs- target	cs- cross walk	cs- cross walk	cs- target	cs- target walk	cs- target	cs- feeder touch	cs- cross	cs+ feeder touch
7	right	grating		right		cs+ feeder touch
8	left	trefoil		left		cs+ cross	cs+ feeder touch
9	right	disk		left	right	cs- target	cs- feeder touch	cs- cross glance	cs- feeder touch	cs- target	cs+ cross walk	cs+ feeder	cs+ target	cs- target	cs- feeder	cs- feeder touch	cs- cross glance	cs+ cross	cs+ feeder touch
10	right	diamond		right		cs+ feeder touch
11	left	grating		right		cs- target walk	cs- feeder touch	cs- cross walk	cs- target walk	cs- feeder touch	cs- cross walk	cs- target walk	ca- feeder touch	cs- cross	cs+ feeder touch
12	right	diamond		right		cs+ feeder touch
13	left	trefoil		left		cs+ cross glance	cs+ feeder touch
14	right	disk		right		cs+ cross walk	cs+ feeder touch
15	left	grating		left		cs+ cross walk	cs+ feeder touch
16	left	diamond		left		cs+ cross walk	cs+ feeder touch
17	right	trefoil		right		cs+ cross walk	cs+ feeder touch
18	right	disk		right		cs+ cross glance	cs+ feeder touch
19	left	trefoil		right	left	cs- target	cs- feeder touch	cs- target walk	cs- target	cs- target walk	cs- feeder touch	cs- target walk	cs- feeder touch	cs- target walk	cs- cross walk	cs- cross	cs- target walk	ca- feeder touch	cs- target walk	cs- feeder touch	cs- target	cs- cross	cs- cross	cs+ feeder touch
20	left	diamond		right	left	cs- feeder touch	cs- cross	cs- feeder touch	cs- cross	cs- feeder touch	cs- feeder touch	cs- feeder touch	cs- cross	cs- target	cs- target walk	cs- cross walk	cs- target	cs- target walk	cs- cross walk	cs- cross	cs- feeder touch	cs- target glance	cs+ cross	cs+ feeder touch
21	right	grating		right		cs+ cross glance	cs+ feeder touch
22	left	disk		right	left	cs- target	cs- feeder touch	cs- feeder touch	cs- cross	cs- target	cs- target	cs- target	cs- feeder touch	cs- feeder touch	cs- cross	cs- target	cs+ cross	cs+ feeder touch
23	right	trefoil		right		cs+ cross walk	cs+ feeder touch
24	left	diamond		left		cs+ feeder touch
25	right	trefoil		right		cs+ target	cs+ feeder touch
26	left	grating		right	left	cs- feeder touch	cs- cross	cs- cross	cs- feeder touch	cs- feeder touch	cs- cross	cs- feeder touch	cs- cross	cs+ cross glance	cs+ feeder touch
27	left	disk		right	left	cs- target	cs- feeder touch	cs- target	cs- feeder	cs- target walk	cs- feeder touch	cs- cross	cs+ cross	cs+ feeder touch
28	right	diamond		left	right	cs- target walk	cs- feeder touch	cs- cross	cs- target walk	cs- feeder touch	cs- cross	cs+ cross	cs+ cross	cs+ feeder touch
29	left	grating		right		cs- feeder touch	cs- cross glance	cs- feeder touch	cs- cross	cs- target	cs- feeder touch	cs- target glance	cs- cross	cs- target	cs- feeder touch	cs- cross	cs+ target	cs+ feeder touch
30	right	trefoil		right		cs+ cross	cs+ feeder touch
31	right	disk		right		cs+ cross	cs+ target	cs+ target	cs+ cross walk	cs+ feeder touch
32	left	trefoil		right	left	cs- feeder touch	cs- target glance	cs- feeder	cs- feeder touch	cs- feeder touch	cs- feeder touch	cs- cross	cs+ target glance	cs+ cross	cs+ target	cs+ feeder touch
33	right	diamond		left	right	cs- target	cs- feeder touch	cs- target	cs- feeder touch	cs- target	cs- cross	cs- target	cs+ cross	cs+ feeder touch
34	left	grating		right	left	cs- cross	cs- target	cs- feeder touch	cs- cross	cs- target	cs- target	cs- cross	cs+ cross	cs+ target	cs+ cross	cs+ target	cs- target	cs- feeder touch	cs- cross	cs+ cross	cs+ feeder touch
35	left	diamond		left	right	cs+ cross	cs+ cross	cs+ diamond glance	cs+ diamond	cs- target	cs- feeder touch	cs- cross	cs- target	cs- target walk	cs- feeder touch	cs- cross	cs+ target	cs+ cross	cs- target	cs- cross	cs- target walk	cs- feeder touch	cs- cross	cs+ cross	cs+ feeder touch
36	right	disk		left	right	cs- cross walk	cs- feeder touch	cs- cross	cs+ target	cs+ feeder touch
37	right	grating		right		cs+ cross	cs+ feeder touch
38	left	trefoil		right	left	cs- cross	cs- target	cs- feeder touch	cs- target	cs- cross	cs- target	cs- feeder touch	cs- feeder touch	cs- target	cs- feeder touch	cs- feeder touch	cs+ feeder touch
39	right	disk		right		cs+ cross	cs+ feeder touch
40	left	diamond		right	left	cs- target	cs- cross	cs- feeder touch	cs- cross walk	cs- feeder touch	cs- cross walk	cs- target walk	cs- cross walk	cs- cross walk	cs- feeder touch	cs- cross walk	cs+ cross	cs+ target walk	cs+ feeder touch
41	right	trefoil		right		cs+ target	cs+ feeder touch
42	right	grating		left	left	cs- target walk	cs- feeder touch	cs- target walk	cs- target walk	cs- feeder touch	cs- target walk	cs- cross walk	cs- target	cs- feeder touch	cs- cross glance	cs- target	cs- target walk	cs- cross walk	cs- target walk	cs- cross	cs- target walk	cs- feeder touch	cs+ cross	cs+ target	cs+ target	cs+ target	cs+ cross walk	cs+ feeder touch
43	left	disk		right	left	cs- feeder touch	cs- cross glance	cs- feeder touch	cs- cross	cs- target	cs- target	cs- cross	cs- feeder touch	cs- target	cs- feeder touch	cs+ cross	cs+ feeder touch
44	right	diamond		left		cs- target	cs- feeder touch	cs- cross	cs+ cross	cs+ feeder touch
45	left	grating		right	right	cs- target walk	cs- feeder touch	cs- target	cs- cross	cs- target walk	cs- feeder touch	cs+ feeder touch
46	left	diamond		right	left	cs- cross glance	cs- feeder touch	cs- cross	cs+ cross	cs+ feeder touch
47	right	disk		right		cs+ cross glance	cs+ feeder touch
48	left	trefoil		right	left	cs- feeder touch	cs- target	cs- target	cs- cross	cs- target	cs- feeder touch	cs- feeder touch	cs- target	cs- cross	cs+ cross	cs+ cross	cs- feeder touch	cs- target	cs+ cross	cs+ target	cs- cross	cs- target	cs+ cross	cs+ feeder touch
49	left	diamond		right	left	cs- feeder touch	cs- cross	cs+ feeder touch
50	left	grating		right	left	cs- target glance	cs- feeder touch	cs- target	cs- feeder	cs- cross	cs+ cross glance	cs+ feeder touch
Tests	CS+ Side	Target	Half Turn	1st arm	2nd arm	1st Fixation point	2nd	3rd	4	5	6	7	8	9	10	11	12	13	14	15	16	17	18	19	20	21	22	23	24	25	26	27	28	29	30
T1	left	bar		right	left	cs- feeder touch	cs- cross	cs+ cross	cs+ feeder touch	cs+ target glance	cs+ feeder touch	cs- target	cs- feeder touch	cs- cross	cs- target glance	cs- feeder touch	cs+ feeder touch
T2	left	bar		left		cs+ target walk	cs+ feeder touch	cs+ target glance	cs- target glance	cs- feeder touch	cs- feeder touch	cs- feeder touch	cs- target glance	cs- feeder touch	cs- target	cs- cross walking	cs- cross	cs- feeder touch	cs- target	cs- feeder touch	cs- cross	cs- feeder touch	cs- target	cs- cross	cs- feeder touch	cs+ cross	cs+ feeder touch	cs+ target glance	cs+ cross	cs+ feeder touch

## Sheet: Below4
Bee:	Simone
Date:	19.09.2016
	Below
	trefoil
						N° fixations
# Trials	CS+ Side	Target	Half Turn	1st arm	2nd arm	1st Fixation point	2nd	3rd	4th	5th	6th	7th	8th	9	10	11	12	13	14	15	16	17	18	19	20	21	22	23	24	25	26	27	28	29	30	31
1	right	grating		left	right	cs- target	cs+ cross glance	cs+ feeder touch
2	left	disk		right	left	cs- cross walk	cs- target	cs- cross	cs- feeder	cs- target glance	cs- target	cs- feeder touch	cs- cross walk	cs- cross walk	cs- feeder touch	cs- target glance	cs- target walk	cs+ cross walk	cs+ feeder touch
3	right	diamond		right		cs+ feeder touch
4	right	bar		left	left	cs- cross	cs- feeder touch	cs- target glance	cs+ target	cs+ cross glance	cs- cross glance	cs- target glance	cs- feeder touch	cs+ cross glance	cs+ target	cs+ feeder touch
5	left	diamond		left	right	cs+ cross glance	cs- cross	cs+ cross	cs- cross	cs- feeder touch	cs- cross	cs- feeder touch	cs- target glance	cs- feeder touch	cs- feeder touch	cs- feeder touch	cs- target glance	cs+ cross glance	cs+ target glance	cs+ feeder touch
6	right	grating		right		cs+ target	cs+ feeder	cs+ cross	cs- target	cs+ cross glance	cs+ target	cs+ cross	cs+ target glance	cs+ feeder touch
7	left	disk		right	right	cs- target glance	cs- target	cs- feeder touch	cs- target glance	cs- feeder	cs- target	cs+ target	cs+ feeder touch
8	left	bar		right	left	cs- feeder touch	cs- target	cs+ cross	cs- cross glance	cs- feeder	cs- target glance	cs- target glance	cs- feeder touch
9	right	diamond		left	right	cs- cross	cs- feeder touch	cs+ cross glance	cs+ feeder touch
10	right	grating		left	right	cs- cross	cs- feeder touch	cs- target glance	cs- target	cs+ feeder touch
11	left	bar		right	right	cs- feeder touch	cs+ cross glance	cs+ feeder touch
12	right	disk		right	right	cs+ target	cs+ cross glance	cs+ target	cs+ feeder touch
13	left	bar		right	left	cs- feeder touch	cs- cross glance	cs- target glance	cs+ cross	cs- cross glance	cs- feeder touch	cs- feeder touch	cs- feeder touch	cs- cross walk	cs- target	cs- target	cs+ target glance	cs+ feeder touch
14	right	diamond		left	right	cs- cross glance	cs- feeder touch	cs+ cross	cs- cross glance	cs- feeder touch	cs+ feeder touch	cs+ feeder touch
15	left	disk		right	left	cs- target glance	cs+ target glance	cs+ cross glance	cs+ target glance	cs+ feeder touch
16	left	grating		right	right	cs- cross	cs- feeder touch	cs- cross	cs- feeder	cs- target glance	cs+ target glance	cs+ feeder touch
17	right	disk		left	right	cs- target	cs+ cross	cs+ cross	cs+ target glance	cs+ feeder touch
18	left	grating		right	left	cs- cross	cs- feeder touch	cs- target	cs- cross walk	cs- feeder touch	cs- target	cs+ target	cs+ cross glance	cs+ target	cs+ feeder	cs+ cross	cs+ cross glance	cs- cross	cs- feeder touch	cs- target	cs+ cross	cs+ target	cs+ cross	cs- cross	cs- feeder	cs- target	cs+ cross	cs- cross walk	cs- feeder touch	cs- cross walk	cs- cross	cs- feeder touch	cs- target	cs+ target walk	cs+ feeder touch
19	right	diamond		right		cs+ cross glance	cs+ feeder touch
20	left	bar		right	left	cs- cross	cs- feeder touch	cs- target	cs+ target	cs+ feeder touch
21	left	disk		right	right	cs- feeder touch	cs- target	cs- cross	cs- target	cs- cross glance	cs- cross walk	cs- feeder touch	cs- cross walk	cs- feeder touch	cs- cross walk	cs- feeder touch	cs- cross walk	cs- feeder touch	cs- cross walk	cs- feeder touch	cs- target glance	cs+ target walk	cs+ feeder touch
22	right	diamond	towards left and then	right	left	cs+ cross	cs- target glance	cs+ cross glance	cs+ target glance	cs+ feeder	cs+ cross glance	cs- cross	cs- feeder touch	cs- target glance	cs- cross walk	cs- feeder touch	cs- target walk	cs- cross walk	cs- target glance	cs- feeder touch	cs- target walk	cs+ target	cs+ feeder touch
23	left	grating		right	left	cs- feeder touch	cs- target glance	cs+ target	cs+ cross	cs- target glance	cs- target	cs- feeder touch	cs- target glance	cs- cross walk	cs- feeder touch	cs- target	cs- cross walk	cs- feeder touch	cs- target walk	cs+ target walk	cs+ cross glance	cs+ target walk	cs+ feeder touch
24	left	bar		right	left	cs- feeder touch	cs- cross walk	cs- feeder touch	cs- cross walk	cs- target glance	cs- cross walk	cs- feeder touch	cs- cross walk	cs- target glance	cs- cross	cs- feeder touch	cs- cross walk	cs+ target	cs+ feeder touch
25	right	grating		right		cs+ target walk	cs+ feeder touch
26	right	disk		right	left	cs+ cross	cs+ target	cs- cross	cs- target	cs+ cross	cs+ target	cs+ cross	cs+ cross	cs+ feeder touch
27	left	diamond		right	left	cs- cross	cs- target	cs- target	cs+ target walk	cs+ feeder touch
28	right	bar		left	right	cs- cross	cs- feeder touch	cs- target glance	cs- cross glance	cs- feeder touch	cs- target	cs- feeder touch	cs- cross	cs- cross walk	cs- target walk	cs- cross walk	cs- cross walk	cs- feeder touch	cs- cross walk	cs+ target walk	cs+ feeder touch
29	left	grating		right	left	cs- cross glance	cs- feeder touch	cs- cross	cs- target	cs- cross	cs- target	cs- target glance	cs- cross	cs- feeder touch	cs- cross	cs- target	cs+ target	cs+ cross	cs+ target walk	cs+ feeder touch
30	right	disk		right		cs+ target	cs+ cross	cs- cross	cs- target	cs+ target	cs+ cross glance	cs+ cross	cs+ target	cs+ cross glance	cs+ target	cs+ cross glance	cs+ target	cs+ feeder touch
31	left	grating		right	left	cs- feeder touch	cs- cross glance	cs- target	cs- cross walk	cs- target	cs- cross	cs- feeder touch	cs+ target glance	cs+ feeder touch
32	left	diamond		right	left	cs- cross glance	cs- feeder touch	cs- cross walk	cs- target glance	cs- cross glance	cs- target glance	cs- cross walk	cs- target walk	cs- cross	cs- feeder touch	cs- cross walk	cs- target	cs+ cross glance	cs+ target glance	cs+ feeder touch
33	right	bar		right		cs+ feeder touch
34	right	disk		right		cs+ feeder touch
35	left	bar		right	left	cs- feeder touch	cs- cross walk	cs- feeder touch	cs- feeder touch	cs- feeder touch	cs+ target glance	cs+ feeder touch
36	left	grating		right	left	cs- cross walk	cs- feeder touch	cs- feeder touch	cs- cross	cs- target	cs+ cross glance	cs+ target walk	cs+ cross	cs+ target	cs+ feeder touch
37	right	disk		right		cs+ feeder touch
38	right	diamond		left	right	cs- cross glance	cs- feeder touch	cs- cross	cs- feeder touch	cs- cross	cs- feeder	cs- cross	cs- target	cs- feeder touch	cs- cross	cs- target glance	cs+ feeder touch
39	left	grating		right	left	cs- cross	cs- feeder	cs- target	cs- target	cs- feeder touch	cs+ target glance	cs+ feeder touch
40	right	bar		right		cs+ target glance	cs+ feeder touch
41	left	disk		right	right	cs- target	cs- cross	cs- feeder	cs- target glance	cs- cross	cs- feeder touch	cs- feeder touch	cs- target glance	cs- cross	cs- target	cs- cross	cs+ target	cs+ feeder touch
42	left	diamond		right	left	cs- feeder touch	cs- cross glance	cs- feeder touch	cs- feeder touch	cs- cross	cs- target	cs+ cross	cs+ target	cs+ cross	cs- cross	cs- feeder touch	cs- cross	cs- feeder touch	cs- cross	cs+ feeder touch
43	right	bar		right		cs+ target	cs+ cross glance	cs+ feeder touch
44	left	disk		right	left	cs- feeder	cs- target glance	cs- target	cs+ target	cs+ feeder touch
45	right	diamond		right		cs+ target glance	cs+ feeder touch
46	right	grating	towards left and then	right		cs+ feeder touch
47	left	bar		right	left	cs- cross glance	cs- feeder touch	cs- target glance	cs+ feeder touch
48	right	disk		right		cs+ target	cs+ feeder touch
49	left	diamond		right	left	cs- target	cs- feeder touch	cs- target walk	cs- target	cs- feeder touch	cs+ feeder touch
50	right	grating		right		cs+ cross	cs+ target	cs+ feeder touch
Tests	CS+ Side	Target	Half Turn	1st arm	2nd arm	1st Fixation point	2nd	3rd	4	5	6	7	8	9	10	11	12	13	14	15	16	17	18	19
T1	left	trefoil		right	left	cs- cross	cs- feeder touch	cs- target	cs- cross glance	cs- feeder touch	cs- cross walk	cs- feeder touch	cs- target	cs+ target glance	cs+ feeder touch	cs+ target glance	cs+ cross	cs+ cross	cs- target glance	cs- cross walk	cs- feeder touch	cs- cross
T2	right	trefoil		right	left	cs+ target glance	cs+ feeder touch	cs+ target	cs+ feeder touch	cs+ cross	cs+ target	cs+ feeder touch	cs+ cross glance

## Sheet: Below5
Bee:	Cyprine
Date:	21-22.09.2016
	Below
	diamond
						N° fixations
# Trials	CS+ Side	Target	Half Turn	1st arm	2nd arm	1st Fixation point	2nd	3rd	4th	5th	6th	7th	8th	9	10	11	12	13	14	15	16	17	18	19	20	21	22	23	24
1	right	disk		left	right	cs- cross	cs- feeder touch	cs- cross walk	cs- target	cs- target glance	cs- feeder touch	cs- target	cs- cross	cs- cross	cs- feeder touch	cs- cross walk	cs- target glance	cs- cross	cs+ cross glance	cs+ feeder touch
2	left	bar		left		cs+ target	cs+ feeder touch
3	right	grating		right		cs+ cross glance	cs+ feeder touch
4	left	trefoil		right	left	cs- target	cs+ cross	cs+ target	cs+ feeder touch
5	left	bar		right	right	cs- cross	cs- feeder touch	cs- target	cs- target	cs- feeder touch	cs- target	cs- cross	cs- feeder touch	cs- target	cs- cross	cs- feeder touch	cs- target	cs+ target	cs+ target	cs+ cross	cs+ feeder touch
6	right	grating		right		cs+ target	cs+ feeder touch
7	right	disk		right		cs+ target glance	cs+ feeder touch
8	left	trefoil		right	left	cs- feeder touch	cs- feeder touch	cs- target	cs- feeder touch	cs- target	cs- feeder touch	cs- feeder touch	cs- target	cs- feeder touch	cs- cross	cs- feeder touch	cs- cross	cs+ feeder touch
9	right	grating		left	left	cs- feeder touch	cs- target	cs- target walk	cs- feeder touch	cs- cross walk	cs- target	cs- target	cs- cross	cs- feeder touch	cs- cross walk	cs- target glance	cs- target	cs- cross	cs- feeder touch	cs- cross	cs+ target	cs+ feeder touch
10	left	bar		right	right	cs- cross	cs- feeder touch	cs- target	cs- cross	cs- target glance	cs- cross	cs- cross	cs- feeder touch	cs- target glance	cs- cross	cs- cross walk	cs- feeder touch	cs- target walk	cs- cross walk	cs- feeder	cs- cross	cs- feeder touch	cs- target glance	cs- cross	cs- feeder touch	cs- cross	cs+ target	cs+ feeder touch
11	left	trefoil		left		cs+ cross	cs+ feeder touch
12	right	disk		right		cs+ cross glance	cs+ target	cs+ feeder touch
13	left	grating		right		cs- target	cs- cross	cs- feeder touch	cs- feeder touch	cs- cross glance	cs- feeder touch	cs- cross glance	cs- feeder touch	cs- feeder touch	cs- cross walk	cs- target glance	cs- cross	cs- feeder touch	cs- cross	cs- target	cs- target	cs+ cross	cs+ target	cs+ feeder touch
14	right	bar		left	right	cs- target glance	cs- cross	cs- feeder touch	cs- feeder touch	cs- cross	cs- feeder touch	cs- cross	cs- target	cs+ cross	cs+ target	cs+ feeder touch
15	right	grating		right		cs+ cross glance	cs+ target	cs+ feeder touch
16	left	trefoil		right	left	cs- cross glance	cs- feeder touch	cs- cross	cs- cross walk	cs- target walk	cs- feeder touch	cs- feeder touch	cs- cross walk	cs- cross walk	cs- feeder touch	cs- target glance	cs+ cross glance	cs+ feeder touch
17	left	disk		right		cs- target	cs- cross	cs- target	cs- cross	cs- feeder	cs- cross glance	cs- feeder touch	cs- feeder touch	cs- cross	cs- target	cs- feeder touch	cs- feeder touch	cs- cross glance	cs- feeder touch	cs- cross walk	cs- target	cs+ target glance	cs+ feeder touch
18	right	trefoil	hesitate between 2	left	right	cs- cross	cs- feeder touch	cs- target	cs- target glance	cs- cross	cs- feeder touch	cs- target glance	cs- feeder touch	cs- cross walk	cs- feeder touch	cs- target walk	cs+ cross	cs+ feeder	cs+ target walk	cs+ feeder touch
19	left	grating		right	left	cs- cross	cs- target	cs- cross	cs- cross	cs- target	cs- cross walk	cs- feeder touch	cs- cross walk	cs- target	cs- cross	cs- feeder touch	cs- cross	cs- target	cs- cross walk	cs- feeder touch	cs- cross walk	cs+ target walk	cs+ feeder touch
20	right	bar		left	right	cs- cross glance	cs- feeder touch	cs+ cross glance	cs+ feeder touch
21	left	trefoil		left		cs+ cross	cs- target	cs- feeder touch	cs- target	cs- cross	cs- feeder touch	cs- target	cs- cross	cs- feeder touch	cs- target	cs- feeder touch	cs- target walk	cs- feeder touch	cs- target walk	cs- cross	cs- feeder touch	cs- target walk	cs- feeder touch	cs- cross walk	cs+ target walk	cs+ feeder touch
22	left	grating		left		cs+ target glance	cs+ feeder	cs+ cross	cs+ cross	cs+ target	cs+ feeder touch
23	right	disk		right		cs+ feeder touch
24	left	bar		left		cs+ target	cs+ cross glance	cs+ feeder touch
25	right	disk		left	right	cs- cross	cs- target glance	cs- cross	cs- feeder	cs- target glance	cs+ target	cs+ feeder touch
26	right	trefoil		right		cs+ cross	cs+ target	cs+ cross	cs+ target walk	cs+ feeder touch
27	left	grating		right		cs- target	cs- feeder touch	cs- target	cs- cross walk	cs- target	cs- cross	cs- target	cs- feeder touch	cs- cross	cs- target	cs- feeder touch	cs- target	cs- cross	cs- target	cs+ cross glance	cs+ feeder touch
28	right	bar		left	right	cs- cross	cs- feeder	cs- cross	cs+ cross	cs+ feeder touch
29	left	disk		left		cs+ feeder	cs+ target glance	cs+ feeder touch
30	right	grating	hesitate between 2	right		cs+ cross	cs+ feeder touch
31	right	trefoil		right		cs+ cross glance	cs+ target	cs+ feeder touch
32	left	bar	(day2)	left		cs+ cross glance	cs+ feeder touch
33	left	disk		right	left	cs- cross glance	cs- feeder touch	cs- feeder touch	cs- cross walk	cs- cross	cs- target glance	cs- cross	cs- target	cs- cross	cs- feeder touch	cs- cross walk	cs+ feeder touch
34	right	grating		left	left	cs- feeder touch	cs- cross	cs- target	cs- feeder touch	cs- cross	cs- feeder touch	cs- cross	cs- target	cs- target	cs- cross	cs- feeder touch	cs- feeder touch	cs- cross	cs- target	cs- feeder touch	cs- cross	cs- target	cs+ cross	cs+ target	cs+ feeder touch
35	left	trefoil		left		cs+ cross glance	cs+ feeder touch
36	left	grating		left		cs+ target glance	cs+ feeder touch
37	right	bar	hesitate between 2	right		cs+ feeder touch
38	left	disk		left	left	cs- feeder touch	cs- target walk	cs- cross	cs- target	cs- feeder touch	cs- cross	cs- target glance	cs- feeder touch	cs- target	cs- cross	cs- target	cs- feeder touch	cs- cross	cs- feeder touch	cs- feeder touch	cs- target glance	cs- cross	cs- cross glance	cs- feeder touch	cs- target glance	cs+ target	cs+ cross walk	cs+ cross walk	cs+ feeder touch
39	right	trefoil		left		cs- target glance	cs- feeder touch	cs- cross glance	cs- feeder touch	cs- target glance	cs- cross	cs- feeder	cs- cross	cs- target	cs- feeder touch	cs- target	cs- feeder touch	cs- target	cs- target	cs- feeder touch	cs- target	cs- cross	cs- feeder	cs+ cross glance	cs+ feeder touch
40	right	disk		left	left	cs- target glance	cs- feeder touch	cs- target glance	cs- feeder touch	cs- cross	cs+ target	cs+ cross walk	cs+ feeder touch
41	left	bar		left		cs+ target glance	cs+ feeder touch
42	right	grating		left	right	cs- cross	cs- target glance	cs- feeder	cs- target glance	cs+ target	cs+ feeder	cs+ cross	cs- target glance	cs+ feeder touch
43	right	disk		left	right	cs- cross	cs- feeder	cs- cross glance	cs+ feeder touch
44	left	bar		right	left	cs- target glance	cs- cross glance	cs+ feeder touch
45	right	trefoil		left	right	cs- cross glance	cs- feeder touch	cs- cross glance	cs- feeder touch	cs- cross glance	cs- feeder touch	cs- cross glance	cs+ target glance	cs+ feeder touch
46	left	grating		right	left	cs- target glance	cs- cross	cs- target glance	cs+ target	cs- cross	cs- cross	cs- cross	cs- target	cs- cross	cs- cross	cs- feeder touch	cs- target	cs- cross	cs- feeder	cs- cross	cs- cross walk	cs- feeder touch	cs- cross	cs+ target	cs+ feeder touch
47	left	bar		left		cs+ cross	cs+ target	cs+ feeder	cs+ cross glance	cs+ feeder touch
48	right	disk		right		cs+ target glance	cs+ feeder	cs- feeder	cs- feeder	cs- cross glance	cs+ target	cs+ feeder	cs+ target	cs+ cross	cs+ feeder touch
49	left	trefoil		right	left	cs- target glance	cs- cross glance	cs- feeder touch	cs- target glance	cs- cross	cs- feeder	cs- cross	cs- target glance	cs- feeder	cs+ target	cs+ feeder touch
50	right	grating		right		cs+ target glance	cs+ feeder touch
Tests	CS+ Side	Target	Half Turn	1st arm	2nd arm	1st Fixation point	2nd	3rd	4	5	6	7	8	9	10	11	12	13	14	15	16	17	18	19	20	21	22	23	24	25	26	27
T1	right	diamond		left	right	cs- target	cs- cross	cs- feeder touch	cs- target	cs+ feeder touch	cs+ cross	cs- cross	cs- feeder	cs+ feeder	cs+ cross	cs- target glance	cs- cross	cs- target	cs- target	cs- feeder touch	cs+ target	cs+ feeder touch	cs+ cross	cs- cross	cs- feeder touch	cs+ cross	cs+ feeder touch	cs+ target	cs+ cross	cs+ cross
T2	left	diamond		left	right	cs+ feeder touch	cs+ cross glance	cs+ target	cs+ feeder touch	cs+ cross	cs+ feeder touch	cs+ target	cs- feeder touch	cs- target	cs- target glance	cs- cross	cs- feeder touch	cs- target	cs- cross	cs+ target glance	cs+ feeder touch	cs+ cross glance	cs+ target	cs- cross	cs- feeder touch	cs- target glance	cs- feeder touch	cs- target glance	cs- cross	cs- feeder touch	cs- feeder touch
						00:06:00

## Sheet: Above4
Bee:	Rosie
Date:	23-24/09/2016
	Above
	Disk
						N° fixations
# Trials	CS+ Side	Target	Half Turn	1st arm	2nd arm	1st Fixation point	2nd	3rd	4th	5th	6th	7th	8	9	10	11	12	13	14	15	16	17	18	19	20	21
1	left	grating		left		cs+ cross	cs+ feeder touch
2	right	diamond		left	right	cs- target glance	cs- feeder touch	cs- cross glance	cs- feeder	cs- cross	cs- cross	cs+ feeder touch
3	right	trefoil		left	right	cs- target	cs- feeder touch	cs- target glance	cs- feeder touch	cs- target	cs- feeder touch	cs- cross	cs- feeder touch	cs- cross	cs+ cross glance	cs+ feeder touch
4	left	bar		left		cs+ cross glance	cs+ feeder touch
5	right	trefoil		left	right	cs- feeder touch	cs- feeder touch	cs- cross	cs- cross	cs- cross	cs- feeder touch	cs- feeder touch	cs- cross glance	cs+ feeder touch
6	left	grating		left		cs+ cross	cs+ feeder touch
7	left	diamond		left		cs+ cross glance	cs+ feeder touch
8	right	bar		left	right	cs- feeder	cs- feeder	cs- feeder touch	cs- target	cs- feeder touch	cs- feeder touch	cs- target	cs- target	cs- feeder touch	cs+ cross glance	cs+ feeder touch
9	left	trefoil		left		cs+ cross	cs+ feeder touch
10	right	bar		left	right	cs- target	cs- feeder touch	cs- target	cs- feeder	cs- cross	cs- feeder	cs- target	cs- target	cs- feeder touch	cs- cross	cs- target	cs+ cross glance	cs+ feeder touch
11	right	grating		left	right	cs- target glance	cs- feeder touch	cs- target	cs- feeder touch	cs- feeder	cs- target	cs+ cross glance	cs+ feeder touch
12	left	trefoil	right and then flight up	right	left	cs- cross glance	cs- target	cs- feeder touch	cs- cross glance	cs- feeder	cs- cross	cs- cross	cs- target	cs- feeder	cs- cross	cs- target	cs- feeder touch	cs- cross	cs- target	cs- feeder touch	cs- target	cs- target	cs- cross	cs+ target	cs+ feeder touch
13	right	diamond		left	right	cs- target	cs- feeder touch	cs- cross	cs- target glance	cs- feeder touch	cs- cross	cs- target	cs- feeder touch	cs- cross	cs- target	cs- cross glance	cs- feeder touch	cs- cross glance	cs+ cross glance	cs+ feeder touch
14	left	grating		left		cs+ cross	cs+ feeder touch
15	left	bar		right	left	cs- feeder touch	cs- cross	cs- target glance	cs- feeder touch	cs- target	cs- feeder touch	cs- target	cs- cross	cs- feeder touch	cs+ feeder touch
16	right	diamond		left	right	cs- target	cs- feeder touch	cs- cross	cs- feeder touch	cs- target	cs- target	cs- cross	cs- feeder	cs- target	cs- feeder touch	cs- cross	cs- target	cs- target	cs- cross	cs- feeder touch	cs- cross glance	cs+ feeder touch
17	right	trefoil	hesitate	left	right	cs- target	cs- feeder touch	cs- target	cs- feeder touch	cs- cross	cs- cross	cs- target	cs- cross glance	cs- target glance	cs- feeder touch	cs- target	cs- feeder touch	cs- cross	cs+ cross walk	cs+ feeder touch
18	left	diamond		left		cs+ target	cs+ feeder touch
19	right	grating		left	right	cs- target	cs- feeder touch	cs- cross	cs- target	cs- feeder touch	cs- target	cs- feeder touch	cs- cross	cs- target	cs- feeder	cs- target	cs- target	cs- feeder touch	cs- cross walk	cs+ cross	cs+ feeder touch
20	left	bar		left		cs+ cross	cs+ feeder touch
21	left	trefoil		right	right	cs- target walk	cs- feeder touch	cs- target	cs- target	cs- feeder touch	cs- target	cs- cross	cs- target walk	cs- feeder touch	cs- target walk	cs- feeder touch	cs+ cross	cs+ feeder touch
22	right	grating		left	right	cs- target	cs- cross walk	cs- feeder touch	cs- cross	cs- target	cs- feeder touch	cs- cross walk	cs+ cross	cs+ cross walk	cs+ feeder touch
23	right	bar		left	right	cs- target	cs- feeder touch	cs- target walk	cs- target	cs- target walk	cs- feeder touch	cs- target walk	cs- feeder touch	cs- target walk	cs- feeder touch	cs+ feeder touch
24	right	diamond		left	left	cs- target	cs- feeder touch	cs- cross walk	cs- feeder touch	cs- cross	cs- feeder touch	cs- cross	cs- cross glance	cs- targer glance	cs- cross	cs- feeder	cs- target	cs- cross walk	cs- feeder touch	cs+ cross	cs+ feeder touch
25	left	grating		left		cs+ cross	cs+ feeder touch
26	left	bar		left		cs+ cross	cs+ feeder touch
27	right	trefoil		left		cs- target	cs- feeder touch	cs- target	cs- cross	cs- feeder	cs- cross	cs- target	cs- feeder touch	cs- cross	cs- target	cs- feeder touch	cs- cross	cs- target	cs- cross	cs- feeder touch	cs+ cross walk	cs+ feeder touch
28	left	diamond		left		cs+ cross walk	cs+ feeder touch		`
29	left	trefoil	towards left then	right	left	cs- feeder touch	cs- target walk	cs- feeder	cs- target	cs- cross	cs- target	cs- cross	cs- target	cs- feeder touch	cs- target	cs- cross walk	cs+ feeder touch
30	right	bar		left	right	cs- target	cs- cross walk	cs- cross	cs- feeder touch	cs- target	cs- cross	cs- target	cs- target	cs- cross	cs+ cross walk	cs+ target	cs+ target walk	cs+ feeder touch
31	right	grating		left	right	cs- target	cs- feeder touch	cs- target	cs- target	cs- target	cs- feeder touch	cs- target	cs- cross glance	cs- target	cs- feeder touch	cs- target	cs- target walk	cs- feeder touch	cs- target	cs+ feeder touch
32	left	diamond		left		cs+ cross	cs+ target	cs+ feeder touch
33	right	grating		left	right	cs- feeder touch	cs+ feeder touch
34	right	diamond		left	right	cs- cross glance	cs- feeder touch	cs- feeder touch	cs+ cross	cs+ target glance	cs+ feeder touch
35	left	bar		left		cs+ cross	cs+ target glance	cs+ feeder touch
36	left	trefoil		left		cs+ target	cs+ feeder touch
37	right	diamond		left	right	cs- target	cs- cross	cs- target	cs- cross	cs- feeder	cs+ cross glance	cs+ feeder touch
38	left	grating		left		cs+ cross glance	cs+ feeder touch
39	right	trefoil		left	right	cs- target	cs- cross	cs- target glance	cs- feeder touch	cs- feeder touch	cs- target	cs- feeder	cs- target	cs- feeder touch	cs- feeder touch	cs+ cross glance	cs+ feeder touch
40	left	bar		left		cs+ cross	cs+ cross	cs+ target	cs+ feeder touch
41	right	grating		left	right	cs- target glance	cs- feeder	cs- cross	cs- target	cs- feeder touch	cs- feeder touch	cs- cross	cs+ feeder touch
42	left	diamond		left		cs+ feeder	cs+ feeder touch
43	left	bar		left		cs+ feeder touch
44	right	trefoil		left	right	cs- feeder touch	cs- target	cs- feeder touch	cs- target	cs- feeder	cs- target	cs- feeder	cs- target	cs- target	cs- feeder touch	cs- cross glance	cs+ feeder touch
45	left	diamond		left		cs+ cross glance	cs+ feeder touch
46	right	bar		left	right	cs- feeder	cs- cross	cs+ feeder	cs+ cross	cs+ feeder touch
47	right	grating		left	right	cs- target glance	cs- feeder touch	cs- cross glance	cs- target	cs- feeder touch	cs- cross glance	cs- target	cs- feeder	cs- target	cs- feeder touch	cs- cross	cs+ feeder touch
48	left	trefoil		left		cs+ feeder touch
49	right	diamond		left		cs- target	cs- feeder touch	cs- cross	cs+ cross glance	cs+ target	cs+ cross	cs+ target	cs+ target	cs+ cross	cs+ target walk	cs+ feeder touch
50	left	grating		left		cs+ cross	cs+ feeder touch
Tests	CS+ Side	Target	Half Turn	1st arm	2nd arm	1st Fixation point	2nd	3rd	4	5	6	7	8	9	10	11	12	13	14	15	16	17	18	19	20	21	22	23	24
T1	right	disk		left	right	cs- target glance	cs- feeder touch	cs- target glance	cs- feeder touch	cs- target	cs- feeder touch	cs+ cross	cs+ feeder touch	cs+ feeder touch	cs+ cross	cs+ feeder touch	cs+ cross	cs+ feeder touch	cs+ cross	cs+ feeder touch	cs+ target	cs+ cross walk	cs+ feeder touch	cs+ target
T2	left	disk		left	right	cs+ feeder	cs+ cross glance	cs+ feeder touch	cs+ cross	cs+ feeder	cs+ cross	cs+ feeder touch	cs- target	cs- feeder touch	cs- targett	cs+ cross	cs+ feeder touch	cs- target	cs- feeder touch	cs- cross	cs- feeder	cs+ cross	cs+ feeder touch	cs- target	cs- feeder touch	cs- target	cs- feeder touch	cs- feeder touch	cs- cross

## Sheet: Above5
Bee:	Elizabeth
Date:	2016-09-26
	Above
	grating
						N° fixations
# Trials	CS+ Side	Target	Half Turn	1st arm	2nd arm	1st Fixation point	2nd	3rd	4th	5th	6th	7th	8	9	10	11	12	13	14	15	16	17	18	19	20	21	22	23	24	25	26	27	28	29	30	31	32	33	34	35	36
1	right	trefoil		right	left	cs- target	cs- feeder touch	cs- target walk	cs- cross	cs- target walk	cs- feeder touch	cs+ cross	cs+ feeder touch
2	left	disk		right	left	cs- target	cs- feeder touch	cs- cross	cs- cross	cs- target	cs- feeder touch	cs- cross	cs- target	cs- feeder touch	cs- cross	cs+ target glance	cs+ cross	cs+ feeder touch
3	left	bar		left		cs+ cross	cs+ feeder touch
4	right	diamond		left	right	cs- target	cs- feeder touch	cs- cross	cs+ cross	cs+ feeder touch
5	left	disk		right		cs- target	cs- feeder touch	cs- cross	cs- cross	cs- feeder touch	cs- feeder touch	cs- target	cs- target	cs- feeder touch	cs- cross	cs- cross	cs- target	cs- feeder	cs- feeder touch	cs- feeder touch	cs+ target	cs+ feeder touch
6	right	trefoil		right	left	cs+ cross	cs+ target	cs- target	cs- feeder touch	cs- cross	cs- feeder	cs- target	cs- feeder touch	cs- cross	cs- target walk	cs- feeder touch	cs- target walk	cs- cross	cs+ target	cs+ feeder	cs+ cross	cs+ target	cs- target	cs- feeder touch	cs- cross	cs- target	cs- feeder touch	cs- target	cs- cross	cs- cross	cs+ cross	cs+ feeder	cs+ target	cs+ cross	cs- target	cs- feeder touch	cs- cross	cs+ target	cs+ cross	cs+ feeder touch
7	right	bar		right		cs+ cross glance	cs+ feeder touch
8	left	diamond		left		cs+ cross	cs+ feeder touch
9	right	trefoil		left	right	cs- target	cs- cross walk	cs- feeder touch	cs- cross walk	cs- feeder touch	cs- cross walk	cs- feeder	cs- cross	cs- target	cs- cross	cs- cross	cs- target	cs- target	cs- cross walk	cs- feeder touch	cs+ target	cs+ feeder touch
10	left	diamond		left		cs+ feeder touch
11	left	bar		left		cs+ feeder touch
12	right	disk		left	right	cs- target	cs- feeder touch	cs- cross	cs- feeder touch	cs- target	cs- feeder touch	cs- cross	cs+ cross	cs+ feeder touch
13	left	diamond		right	left	cs- target glance	cs- feeder touch	cs- target glance	cs- feeder touch	cs- target	cs- cross	cs+ cross	cs+ cross	cs+ feeder touch
14	right	trefoil		right		cs+ cross	cs+ feeder touch
15	left	disk		right	left	cs- target	cs- feeder touch	cs- cross	cs- target	cs- target	cs- feeder	cs- target	cs- feeder	cs- target	cs- target	cs+ cross	cs+ feeder touch
16	right	bar		left	right	cs- feeder touch	cs- target	cs- cross	cs+ cross glance	cs+ feeder touch
17	right	disk		left	right	cs- feeder touch	cs- cross	cs- target glance	cs- feeder touch	cs- cross walk	cs- feeder touch	cs- target	cs- feeder touch	cs- cross	cs+ cross	cs+ feeder touch
18	left	diamond		right	left	cs- target glance	cs- feeder touch	cs- target	cs- cross	cs+ cross glance	cs+ feeder touch
19	right	bar	went left then right	right		cs+ cross	cs+ feeder touch
20	left	trefoil		left		cs+ cross glance	cs+ feeder touch
21	left	disk		right	left	cs- target	cs- cross	cs- feeder touch	cs- cross	cs- target	cs- cross walk	cs- feeder touch	cs- cross	cs- feeder	cs+ cross	cs+ target	cs+ feeder touch
22	right	trefoil		left	right	cs- feeder touch	cs- cross	cs+ feeder touch
23	right	bar		left	left	cs- cross glance	cs- feeder	cs- cross	cs- target	cs- cross	cs- feeder touch	cs- cross	cs- feeder	cs- feeder touch	cs- cross	cs- target	cs- cross	cs- feeder touch	cs+ feeder touch
24	left	diamond		left		cs+ cross	cs+ feeder touch
25	right	trefoil		left	right	cs- target	cs- feeder touch	cs- target	cs- cross	cs- target glance	cs- feeder touch	cs- feeder touch	cs- feeder touch	cs- cross	cs+ target	cs+ cross	cs+ feeder touch
26	left	disk		left		cs+ target	cs+ feeder touch
27	left	bar		right		cs+ cross	cs+ feeder touch
28	right	diamond		left	left	cs- target walk	cs- feeder touch	cs- cross	cs- feeder touch	cs- cross	cs- cross	cs- feeder	cs- target	cs- feeder touch	cs- cross	cs- target	cs- cross	cs- feeder	cs- target	cs- cross	cs- target	cs- cross	cs+ cross	cs+ feeder touch
29	right	trefoil		right		cs+ cross	cs+ target	cs+ feeder touch
30	left	bar		left		cs+ feeder touch
31	right	diamond		left	right	cs- target glance	cs- feeder touch	cs- feeder touch	cs- target	cs- feeder touch	cs- target	cs- target	cs- feeder touch	cs- feeder touch	cs- target	cs- feeder touch	cs+ cross	cs+ target walk	cs+ feeder touch
32	left	disk		right	left	cs- target glance	cs- feeder touch	cs- feeder touch	cs- feeder touch	cs- target	cs- cross	cs+ feeder	cs+ cross	cs+ target glance	cs+ cross	cs+ target	cs+ cross	cs+ feeder touch
33	right	bar		left	right	cs- target	cs- feeder touch	cs- feeder touch	cs- cross	cs+ feeder touch
34	right	trefoil		left	left	cs- target	cs- feeder touch	cs- feeder touch	cs- target	cs- feeder touch	cs- target	cs- feeder touch	cs- feeder	cs- feeder touch	cs- target	cs- feeder touch	cs- feeder touch	cs+ target	cs+ cross	cs+ target	cs+ cross	cs+ feeder touch
35	left	disk		right	left	cs- target glance	cs- feeder touch	cs- target	cs- cross	cs- target	cs- feeder touch	cs- feeder	cs- target	cs- cross	cs+ cross glance	cs+ feeder touch
36	right	diamond		left	left	cs- feeder touch	cs- cross	cs- target	cs- cross	cs- feeder touch	cs- target	cs- cross	cs- cross	cs- feeder	cs- target	cs- cross	cs- feeder touch	cs- target glance	cs- cross	cs+ target	cs+ feeder touch
37	left	bar		right	left	cs- feeder touch	cs- feeder touch	cs- cross	cs+ feeder touch
38	left	trefoil		left		cs+ cross glance	cs+ feeder touch
39	right	disk		left	left	cs- feeder touch	cs- target glance	cs- cross	cs- feeder touch	cs- feeder touch	cs- target glance	cs- cross	cs- feeder touch	cs- feeder touch	cs- feeder touch	cs- feeder touch	cs- target	cs- feeder touch	cs- feeder touch	cs+ cross	cs+ feeder touch
40	left	diamond		left	right	cs- target	cs- feeder touch	cs- cross	cs+ cross	cs+ feeder touch
41	right	disk		left	right	cs- feeder	cs- target	cs- feeder	cs- target	cs- cross	cs- cross	cs+ target	cs+ cross	cs+ cross	cs+ feeder touch
42	left	trefoil		left		cs+ feeder touch
43	right	bar		left	right	cs- target walk	cs- feeder touch	cs- cross	cs- target	cs- feeder touch	cs- target	cs- target walk	cs- feeder touch	cs- target	cs+ cross	cs+ feeder touch
44	left	diamond		left	right	cs- target	cs- feeder touch	cs- feeder touch	cs- cross	cs+ feeder touch
45	left	trefoil		left		cs+ feeder touch
46	right	bar		left	left	cs- target	cs- feeder touch	cs- feeder touch	cs- target	cs- target	cs- cross	cs- feeder touch	cs- target	cs- cross glance	cs- target	cs- cross	cs- target	cs- cross	cs- target	cs- feeder touch	cs- feeder touch	cs- feeder touch	cs- target	cs- cross	cs+ target	cs+ cross	cs+ feeder	cs+ feeder touch
47	left	diamond		right	right	cs- target glance	cs- feeder touch	cs- feeder touch	cs- target	cs- cross	cs- target	cs- cross	cs- target	cs- feeder touch	cs- target	cs- target	cs- cross	cs+ feeder touch
48	right	disk		left	right	cs- target	cs- feeder touch	cs- feeder touch	cs- cross	cs+ cross	cs+ feeder touch
49	right	trefoil		right		cs+ cross	cs+ feeder touch
50	left	diamond		left		cs- target	cs- feeder touch	cs- cross	cs- target glance	cs- feeder touch	cs- cross	cs- target	cs- feeder touch	cs- cross	cs- target	cs- feeder touch	cs- cross	cs+ target	cs+ feeder touch
Tests	CS+ Side	Target	Half Turn	1st arm	2nd arm	1st Fixation point	2nd	3rd	4	5	6	7	8	9	10	11	12	13	14	15	16	17	18	19	20	21	22	23
T1	right	grating		left	right	cs- target glance	cs- feeder touch	cs- cross	cs+ target	cs+ cross	cs+ feeder touch	cs+ target	cs+ cross walk	cs+ cross walk	cs+ feeder touch	cs+ target	cs+ cross	cs+ cross walk	cs+ feeder touch	cs+ target	cs+ cross	cs+ feeder touch	cs+ target	cs+ cross	cs+ feeder	cs+ cross	cs+ cross
T2	left	grating		left	right	cs+ cross walk	cs- target walk	cs- cross walk	cs- feeder touch	cs- target walk	cs+ target	cs+ feeder touch	cs+ target walk	cs+ cross	cs+ cross walk	cs+ target walk	cs- cross walk	cs- feeder touch

[truncated: 11 more sheets: Above6 - Mark, Below6 - Mark, Below7 - Mark, Below8, Above7, Below9, Above8, Above9, Below10, Above10, Below11]
